# Supplementary material for: Identification of heel bone mineral density as a risk factor of Alzheimer’s disease by analyzing large-scale genome-wide association studies datasets
Source: Front Cell Dev Biol. 2023 Nov 30;11:1247067. doi: 10.3389/fcell.2023.1247067 (PMC10720361; doi:10.3389/fcell.2023.1247067)
Supplement: Supplementary file 1 [file Table2.XLSX]

## Sheet: Sheet1
Supplementary Table 2. Demographic description of the AD GWAS datasets in each consortium
Consortium	AD cases			Controls
	N	% female	Mean AA (SD)	N	% female	Mean AAE (SD)
ACT	532	62.6	78.8 (12.7)	1571	55.6	81.7 (5.9)
ADC1	1549	54.3	71.6 (11.0)	512	59.2	76.8 (8.8)
ADC2	727	50.8	61.4 (29.5)	156	67.9	75.8 (7.9)
ADC3	894	54.7	58.6 (32.8)	586	63	72.8 (17.5)
ADC4	304	55.3	73.4 (7.0)	377	63.9	75.7 (8.1)
ADC5	286	53.1	73.7 (7.0)	505	65.5	77.6 (9.0)
ADC6	213	58.2	73.9 (7.6)	338	66.6	74.6 (9.0)
ADNI	268	42.2	75.3 (7.1)	173	40.5	78.6 (5.5)
BIOCARD	6	33.3	73.8 (6.1)	112	62.5	68.0 (5.5)
CHAP	27	63	84.8 (7.6)	144	52.8	81.8 (6.6)
EAS	9	44.4	85.2 (4.9)	141	41.1	84.4 (5.2)
GenADA	666	56.9	72.8 (13.5)	712	63.9	74.2 (7.0)
MAYO	658	57.4	73.6 (4.8)	1046	51.1	72.9 (4.4)
MIRAGE	491	63.3	69.9 (11.5)	738	58.8	70.8 (12.1)
MTC	256	57	73.6 (11.8)	189	61.4	70.9 (9.7)
NIALOAD	1798	65	73.1 (9.3)	1568	60.2	73.8 (9.3)
NBB	80	71.3	74.5 (7.5)	48	56.3	81.5 (9.4)
OHSU	132	62.1	85.9 (5.7)	153	54.9	83.9 (7.6)
PFIZER	696	53.7	73.7 (5.0)	762	54.1	77.2 (4.9)
RMAYO	13	23.1	78.5 (9.0)	233	41.6	79.2 (5.8)
ROSMAP	295	70.5	85.6 (6.2)	769	72	82.2 (7.1)
ROSMAP2	59	78	81.9 (6.9)	217	76	80.8 (7.2)
TARC1	323	61.6	74.0 (7.1)	181	65.2	73.9 (8.2)
TGEN2	668	64.8	67.2 (22.9)	365	48.5	80.0 (8.7)
UKS	596	57.4	72.2 (6.6)	170	51.2	64.1 (3.0)
UMCWRMSSM	1177	64.5	71.1 (17.4)	1126	61.3	73.5 (10.6)
UPITT	1255	62.9	66.8 (22.4)	829	63.3	75.5 (6.0)
WASHU	339	57.2	69.1 (21.5)	187	60.4	76.9 (8.4)
WASHU2	38	57.9	73.4 (7.3)	94	46.8	51.7 (35.2)
WHICAP	73	72.6	83.9 (7.8)	560	60.4	81.7 (6.7)
All ADGC	14428	59.3	71.1 (17.3)	14562	59.3	76.2 (9.9)
AGES	95	51.6	81.5 (0.1)	2708	59.2	75.7 (0.1)
ASPS	277	57.8	76.4 (8.3)	169	58	66.4 (10.8)
CHS	450	66	81.9 (5.2)	1702	60.3	81.1 (5.2)
FHS	330	64	86.1 (7.2)	3910	49	74.0 (9.5)
ROTTERDAM	985	73.2	83.5 (6.6)	4985	57.6	78.0 (7.6)
All CHARGE	2137	67.3	82.6 (12)	13474	55.8	76.7 (8.2)
All EADI	2240	65	75.4 (9.1)	6631	60.6	78.9 (7.0)
MRC	1008	70.3	80.9 (6.5)	873	61.6	75.9 (6.3)
ARUK	939	61	76.6 (9.6)	82	59.8	77.9 (7.6)
BONN	551	63.7	72.9 (8.3)	37	64.9	79.5 (3.6)
WASHU	423	56	82.1 (9.0)	156	65.4	78.5 (9.7)
NIMH	127	63	80.1 (6.1)	-	-	-
UCL:PRION	82	59.8	63.6 (9.9)	-	-	-
UCL:LASER	47	74.5	80.6(7.9)	-	-	-
1958BC	-	-	-	5342	49.8	45.0 (0.0)
KORA	-	-	-	434	49.1	56.0 (7.2)
HNR	-	-	-	353	52.9	54.6 (5.3)
MAYO	-	-	-	-	-	-
All GERAD	3177	64	73.0 (0.2)	7277	51.8	51.0 (0.1)
All	21982			41944
AAO, age at onset; AAE, age at examination;
