# Supplementary material for: Identification of heel bone mineral density as a risk factor of Alzheimer’s disease by analyzing large-scale genome-wide association studies datasets
Source: Front Cell Dev Biol. 2023 Nov 30;11:1247067. doi: 10.3389/fcell.2023.1247067 (PMC10720361; doi:10.3389/fcell.2023.1247067)
Supplement: Supplementary file 4 [file Table1.XLSX]

## Sheet: Sheet1
Supplementary Table 1. Summary statistics for 1362 SNPs with genome-wide significant associations with BMD
SNP	CHR	BP	ALLELE1	ALLELE0	A1FREQ	BETA	SE	P_BOLT_LMM	R2
rs13303327	1	895706	G	A	0.0866789	0.0289903	0.00367471	8.2e-17	0.000133068
rs139603701	1	2904634	A	G	0.983471	0.104629	0.00836482	1.9e-38	0.000355912
rs3830771	1	6693641	C	CATT	0.650162	0.0194123	0.00216908	9.1e-21	0.000171424
rs3765971	1	8445360	C	T	0.341665	-0.0309501	0.00217647	1.8e-51	0.000430925
1:8657844_AT_A	1	8657844	AT	A	0.165803	0.0275657	0.0028145	1.3e-23	0.000210198
rs151178549	1	10312444	T	TTTGTTG	0.711106	0.0140716	0.00229279	4.1e-09	8.1356e-05
rs111368727	1	10343297	T	A	0.801426	0.0182041	0.00289852	1.4e-09	0.000105476
rs4846230	1	10608596	T	C	0.1753	0.0194683	0.00270914	6.5e-14	0.000109588
rs12569242	1	11127511	A	C	0.251901	-0.0215932	0.00240242	2e-21	0.000175733
rs938295	1	16087260	C	T	0.833294	-0.029387	0.00278412	6.1e-25	0.000239933
rs848216	1	16271180	T	C	0.892318	-0.0387617	0.00333429	3.1e-31	0.000288734
rs34032610	1	19724323	A	AG	0.424806	0.0189251	0.00209233	5.7e-19	0.00017503
rs10917477	1	19861106	A	G	0.523478	-0.0138652	0.00207114	5.3e-12	9.59099e-05
rs1772720	1	21905007	G	A	0.925795	-0.0298316	0.00397116	8.1e-15	0.000122273
rs1318236	1	21952024	C	T	0.50458	0.0218171	0.00207157	3e-27	0.000237973
rs5772984	1	22384978	G	GT	0.0840584	0.0399068	0.00414632	1.9e-22	0.000245229
rs11385342	1	22483649	T	TG	0.745365	0.043874	0.00238216	7.9e-82	0.000730687
rs60999980	1	22493090	G	A	0.911393	-0.0293901	0.00372058	9.8e-15	0.00013951
rs144928556	1	22505108	T	TCCAC	0.347735	-0.0148768	0.00229416	1.2e-10	0.000100397
rs79364962	1	22531542	G	A	0.92542	0.0716648	0.00399846	4e-74	0.000708929
rs191270678	1	22671455	C	T	0.979108	-0.089506	0.00850751	3.2e-26	0.000327752
rs6684375	1	22706434	C	T	0.824388	-0.0631368	0.0027088	1.4e-126	0.0011542
rs4655059	1	22735906	A	C	0.510155	0.0416391	0.00215928	1.1e-88	0.00086655
rs139525508	1	23614429	C	CAAATT	0.821473	-0.0173163	0.00272132	1.1e-09	8.79503e-05
rs12135380	1	25171673	A	C	0.615412	-0.0167969	0.00213291	1.1e-14	0.000133552
rs7546500	1	26489633	T	G	0.674848	-0.0162531	0.00220155	2.8e-14	0.00011593
rs745817551	1	27145830	G	GAAAA	0.93615	0.0383008	0.00459454	8e-16	0.000175369
rs3010106	1	27303884	C	T	0.610666	0.0192333	0.00212703	6.9e-20	0.000175899
rs4360494	1	38455891	G	C	0.446359	-0.0200841	0.0020785	3.2e-22	0.000199364
rs116784299	1	39944919	T	G	0.961004	-0.0317847	0.00534957	5.9e-10	7.57202e-05
rs61780429	1	41457693	T	A	0.782417	0.0209349	0.00250983	3.7e-19	0.000149223
rs2810587	1	41973095	A	G	0.223002	-0.0159278	0.0025015	3.9e-11	8.79165e-05
rs728864	1	48530258	G	A	0.663636	-0.0127449	0.00218764	4.1e-09	7.25174e-05
rs1777277	1	56992874	C	A	0.547257	0.0121385	0.00208121	1.3e-10	7.30135e-05
rs11207707	1	61653843	G	C	0.927246	0.0287911	0.0040031	1.3e-12	0.00011184
rs143661929	1	61803688	T	TAC	0.756993	0.0136775	0.00241657	1.4e-09	6.88262e-05
rs12760606	1	67100089	T	A	0.713581	0.020032	0.0022907	3.5e-18	0.00016403
rs12119450	1	68404203	A	G	0.803631	-0.0185227	0.00260569	1.2e-13	0.000108285
rs983034	1	68603586	C	T	0.606024	0.0279837	0.00210708	7.8e-45	0.000373938
rs116251444	1	68650633	C	T	0.951039	-0.0285795	0.00479582	1.5e-09	7.60655e-05
rs2026749	1	68653489	T	G	0.516162	0.0347828	0.00207335	6.7e-64	0.00060429
rs2566752	1	68656697	T	C	0.623942	-0.0385636	0.00213773	3.9e-73	0.000697886
rs143243230	1	68664755	G	GAC	0.462476	-0.0392969	0.00220112	2.7e-74	0.000767774
rs7554551	1	68665023	T	C	0.655644	-0.0275089	0.00216947	1.7e-36	0.000341706
rs2566774	1	68694877	T	C	0.187969	0.0412901	0.00264287	1.2e-62	0.000520452
rs277402	1	75188321	G	A	0.765963	-0.0146672	0.00243773	1.9e-09	7.71288e-05
1:85296916_TG_T	1	85296916	TG	T	0.885196	-0.0182615	0.00325653	5.3e-09	6.77797e-05
rs1325273	1	85332120	T	C	0.291046	0.0225622	0.00231022	1.5e-23	0.000210074
rs167365	1	89180845	C	G	0.38303	0.0177402	0.00212558	2e-16	0.000148746
rs11466587	1	92195086	G	A	0.916519	-0.0248768	0.0037565	1.6e-11	9.46996e-05
rs284200	1	92239336	C	T	0.627553	0.0140808	0.00213644	2.9e-11	9.26829e-05
1:98403226_TTTGTTG_T	1	98403226	TTTGTTG	T	0.226728	-0.0167524	0.00248677	2e-12	9.8406e-05
rs149753617	1	100047634	A	G	0.978804	0.0430186	0.00717349	3e-09	7.67878e-05
rs11576308	1	103370977	G	A	0.391404	-0.0178789	0.00211949	2e-16	0.000152288
rs2488786	1	113010808	A	G	0.386253	0.011971	0.00213637	3.7e-09	6.79442e-05
rs3790608	1	113055023	G	A	0.849131	-0.0387882	0.00289248	2.3e-41	0.000385482
rs1006298	1	113061959	G	C	0.518173	-0.013089	0.00207446	2.3e-10	8.55478e-05
1:114494567_CT_C	1	114494567	CT	C	0.626108	0.0147978	0.00217496	1.9e-11	0.000102523
rs12047028	1	119228871	A	G	0.865313	-0.0319492	0.00302347	5.7e-26	0.00023793
rs113048062	1	119451543	T	TCA	0.532572	-0.0278864	0.0021337	4.6e-40	0.000387176
rs2664726	1	149783072	C	T	0.974944	0.0531625	0.00842435	1.5e-10	0.00013808
rs12048493	1	149927034	A	C	0.609833	-0.0176397	0.00215874	1.4e-17	0.000148072
rs143634417	1	150748134	C	CTTATTTTATT	0.791233	0.015445	0.00255148	5.9e-10	7.88083e-05
rs607518	1	150954671	G	A	0.782247	0.0168176	0.00250131	6.6e-12	9.63532e-05
rs12411216	1	155164480	C	A	0.54147	-0.0154756	0.00206785	1.6e-14	0.000118923
rs945508	1	156907081	T	C	0.464013	-0.0123647	0.00206855	2.4e-09	7.60469e-05
rs10918630	1	162053508	T	C	0.318163	-0.0169284	0.00222442	3.9e-15	0.000124335
rs10917872	1	163855956	G	A	0.53503	0.021053	0.00206787	1e-26	0.000220527
rs10919387	1	170372435	C	T	0.481529	-0.0114434	0.00206688	1.1e-09	6.53863e-05
rs35363078	1	170683707	T	TA	0.534195	-0.0289188	0.0020792	3.8e-45	0.000416193
rs10458358	1	172213404	G	A	0.78246	-0.030854	0.00250588	5.7e-37	0.000324081
rs2586392	1	172254193	T	C	0.752705	-0.027327	0.00239142	4e-32	0.000278006
rs145764789	1	172280452	A	ATGTGTG	0.788141	-0.0301717	0.00253121	5.7e-35	0.000304005
rs17277932	1	172323134	G	A	0.858396	0.0229655	0.00297512	4.6e-15	0.000128217
rs772960943	1	173853833	TGTG	T	0.783451	0.0175545	0.00250835	8.1e-13	0.000104562
rs1609829	1	180909061	T	C	0.296681	0.0138773	0.00227277	2.6e-09	8.03678e-05
rs684527	1	183155482	C	A	0.706104	-0.0147533	0.00228202	1.8e-11	9.0338e-05
rs4418639	1	197359999	G	A	0.409463	0.0157165	0.00211507	4.6e-14	0.000119455
rs12561995	1	197976444	A	G	0.806321	0.0175271	0.00261854	2.7e-12	9.5949e-05
rs537301220	1	200708068	A	AGCGGCGGCG	0.800444	0.0227597	0.00259953	2.1e-20	0.000165485
rs1022463	1	201597947	T	C	0.805854	0.0183781	0.00261618	5.6e-13	0.000105686
rs2993426	1	202165814	G	A	0.592964	0.0117281	0.00210377	3e-09	6.63967e-05
rs76330411	1	202210615	C	T	0.836073	0.015975	0.00282596	2.4e-09	6.9953e-05
rs7516171	1	210466932	C	T	0.823062	-0.0259665	0.00270379	2.2e-24	0.000196386
rs2799098	1	218521609	G	A	0.178097	-0.0187868	0.002692	3.2e-13	0.000103327
rs17514738	1	218988754	T	C	0.60336	0.02134	0.00210736	7.4e-24	0.000217968
rs115330848	1	219768757	C	T	0.925761	0.0389068	0.00397034	1.1e-22	0.000208071
rs12134534	1	219926009	T	C	0.407654	-0.02479	0.00210082	9.6e-35	0.000296791
rs9661050	1	220039256	C	T	0.401373	-0.0251295	0.00234831	4.8e-27	0.00030346
1:220189136_TA_T	1	220189136	TA	T	0.178305	0.0337965	0.00270204	3e-36	0.000334694
rs4304588	1	221476976	C	T	0.593349	0.026689	0.00210742	6.4e-39	0.000343737
rs2609352	1	223184621	C	A	0.678236	0.0154503	0.00220976	3.2e-14	0.000104189
rs2246221	1	227075402	G	A	0.499503	-0.0167433	0.00206533	2.2e-17	0.000140169
rs6672925	1	234738338	G	A	0.272377	0.0139517	0.00232926	3.4e-09	7.71545e-05
rs12756922	1	240569411	A	G	0.839288	-0.0865499	0.00292954	3e-206	0.0020208
rs1414660	1	240586695	C	T	0.8085	-0.090395	0.00261968	2.5e-279	0.00253027
rs114397473	1	240586978	A	T	0.982181	-0.120207	0.00795235	6.2e-54	0.000505783
rs142343894	1	240656550	G	C	0.996365	0.127399	0.0171442	1.1e-14	0.000117567
rs4669522	2	10194192	T	C	0.204998	-0.0180462	0.00255621	1.9e-14	0.00010615
rs4666343	2	19870341	C	T	0.728389	0.0182931	0.00232615	5.5e-15	0.000132408
rs13002567	2	25465720	T	C	0.66651	-0.0193969	0.00218657	1.9e-19	0.000167257
rs563406543	2	26101559	C	G	0.991656	0.0699528	0.0116591	1.2e-09	8.09796e-05
rs537241153	2	26134497	A	G	0.972773	-0.039951	0.00645013	2.9e-10	8.45467e-05
rs55815151	2	28819826	C	T	0.519069	-0.0149854	0.00207643	3.6e-13	0.000112118
rs12714240	2	28941150	G	A	0.358415	0.0229243	0.00215324	2.9e-28	0.000241692
rs10490046	2	40630678	A	C	0.781053	0.0305675	0.00249583	1.6e-35	0.000319572
rs4557030	2	40659565	A	G	0.631573	0.0208735	0.00247906	8.8e-18	0.000202766
rs7584710	2	40909333	C	A	0.63761	-0.0227062	0.00214261	7.6e-27	0.00023826
rs6758586	2	42231893	G	T	0.896407	-0.0615848	0.00397749	5.8e-56	0.000704389
rs563360564	2	42242366	C	A	0.908538	-0.0629472	0.00404487	9.3e-59	0.000658516
rs781293043	2	42267141	A	AAAAG	0.88414	-0.0628363	0.00379345	3.9e-65	0.00080892
rs11887431	2	42267462	C	T	0.765066	-0.0522198	0.00244643	5e-107	0.000980269
rs79964014	2	42270727	A	G	0.869345	0.0437803	0.00306384	1.2e-50	0.000435417
rs12329062	2	42303499	A	G	0.946126	-0.0650373	0.00571959	2.4e-30	0.000431204
2:43420238_ACACT_A	2	43420238	ACACT	A	0.333617	0.0149873	0.00227493	6.8e-12	9.98732e-05
2:43777107_CATTATGTA_C	2	43777107	CATTATGTA	C	0.894935	-0.0269185	0.00343954	5.9e-16	0.000136264
rs665783	2	45881297	G	A	0.697811	0.0217937	0.00224603	7.2e-24	0.000200313
rs74181220	2	53875973	C	T	0.804823	0.0176037	0.00278316	4.9e-11	9.73569e-05
rs11892759	2	54170339	A	G	0.888892	0.0264782	0.00328641	5.7e-18	0.000138485
rs115660490	2	54176733	C	A	0.941861	0.0425566	0.0044062	2.7e-24	0.000198344
rs7591431	2	54222165	C	G	0.940355	0.0426333	0.00438564	9.9e-25	0.000203889
rs56302494	2	54227274	T	C	0.709192	-0.0154372	0.00227591	9.6e-13	9.82963e-05
rs68181474	2	54435842	C	CTT	0.752325	0.0239299	0.00245652	1.7e-22	0.000213402
rs59072058	2	54656332	C	T	0.969811	-0.032991	0.00606664	2.4e-09	6.37319e-05
rs11898505	2	54684557	A	G	0.358585	0.0787181	0.00215162	0.000000000000000000000000000000000000000000000000000000000000000000000000000000000000000000000000000000000000000000000000000000000000000000000000000000000000000000000000000000000000000000000000000000000000000000000000000000000000000000000000000000000000000000000000000000000000000000000000000000000000000000000000139999999999884	0.00285043
rs4671934	2	54687523	C	G	0.566847	-0.017815	0.00210117	1.3e-18	0.000155851
2:54695452_TAAAATAAA_T	2	54695452	TAAAATAAA	T	0.986254	0.105479	0.0106845	5.2e-25	0.000301667
rs67079536	2	54798844	C	T	0.909824	-0.0616926	0.00437798	2.5e-49	0.000624517
rs28517733	2	54803211	A	T	0.82824	-0.038974	0.00371277	9.3e-29	0.000432174
rs10180713	2	54804693	A	G	0.266204	-0.0527968	0.0023413	2.8e-121	0.00108902
rs11402836	2	54819525	C	CT	0.681164	-0.0200728	0.00228747	2.7e-18	0.000175011
rs63629260	2	54895935	T	A	0.993013	-0.139899	0.0162181	7.6e-20	0.000271584
rs11125548	2	55058509	A	T	0.910236	0.0530099	0.00364662	1.1e-50	0.000459198
rs2457660	2	60757419	C	T	0.366303	0.0145946	0.00215246	2.3e-12	9.88864e-05
rs11688492	2	64865804	T	C	0.544194	0.0117076	0.00207097	1.3e-10	6.79985e-05
rs4358110	2	65508409	C	A	0.718451	-0.0151558	0.00229475	1.3e-11	9.29263e-05
rs200873572	2	66405844	A	G	0.854366	0.0179743	0.00297492	2.7e-10	8.03972e-05
rs12469063	2	66764308	A	G	0.756035	-0.0222558	0.00240645	1.2e-22	0.00018272
rs745976	2	68081340	T	C	0.653016	0.0186948	0.00216965	2.1e-19	0.000158382
rs10196674	2	68997153	A	G	0.677805	0.0130144	0.00221971	3.7e-10	7.39779e-05
rs12614998	2	70785806	C	A	0.783105	-0.019861	0.00252185	2.9e-17	0.000133999
rs10445946	2	71594534	C	T	0.427276	-0.0121493	0.0020836	2.1e-09	7.22414e-05
rs11696009	2	72330334	A	C	0.656733	-0.0159726	0.00218118	3e-14	0.000115028
rs6717602	2	75714591	G	A	0.640582	0.015442	0.00218836	3.3e-13	0.000109802
rs6745529	2	85503139	G	T	0.543366	0.0141079	0.00208017	1.3e-11	9.87678e-05
rs36005340	2	97201872	CTTTTTTTTTTTTTTTTTTTTT	C	0.694913	0.0154036	0.00230871	9e-11	0.000100607
rs62153852	2	99934713	C	T	0.727353	-0.0155737	0.00231186	2.1e-11	9.61966e-05
rs13429049	2	111886332	C	T	0.686792	-0.0166252	0.0022242	9.6e-15	0.000118911
rs1519522	2	112047056	T	G	0.549305	-0.0156174	0.00218048	1.4e-11	0.000120766
rs375968322	2	112549789	A	C	0.834677	-0.0268586	0.00280324	1.2e-23	0.00019909
rs2871876	2	112671947	C	T	0.304442	-0.0143316	0.00224733	2.7e-10	8.69876e-05
2:118513385_CT_C	2	118513385	CT	C	0.992653	-0.103422	0.0158872	5.1e-12	0.000156014
rs552277422	2	118606667	A	AG	0.990459	-0.103014	0.0134359	5.2e-17	0.000200564
rs57779429	2	118644145	A	AC	0.773913	-0.0179027	0.00272889	2.5e-09	0.000112159
rs4848490	2	118834552	C	T	0.783466	0.01715	0.00250034	8.7e-12	9.9794e-05
rs62165280	2	118903715	G	A	0.792992	-0.0276834	0.00253916	6.1e-29	0.000251608
rs114124763	2	119012019	C	G	0.953236	-0.102915	0.00492313	4.9e-101	0.000944277
rs144136543	2	119078584	G	A	0.973416	0.0452154	0.00664023	1e-11	0.000105809
rs4073566	2	119161638	C	A	0.225162	0.0693459	0.00248115	2.6e-182	0.00167794
2:119166714_AC_A	2	119166714	AC	A	0.866428	-0.0645507	0.00356743	2.3e-77	0.00096445
rs199727692	2	119166715	C	A	0.969233	-0.0844251	0.00790081	1.2e-30	0.000425095
rs183424609	2	119182956	T	G	0.996667	0.131376	0.0184602	4.2e-13	0.000114669
rs4849701	2	119236496	T	C	0.481392	0.0189	0.00207011	4.8e-20	0.000178358
rs115242848	2	119507607	C	T	0.992209	-0.421323	0.0121275	2.9e-282	0.00274446
rs560102628	2	119510493	G	GC	0.989958	-0.377157	0.0114619	6.4e-257	0.00282821
rs10199437	2	119527123	G	A	0.0586663	0.0553334	0.00438469	1.7e-37	0.000338172
rs55983207	2	119529829	T	C	0.962973	-0.0415313	0.00572489	2.4e-14	0.000123002
rs547130337	2	119553022	G	A	0.99713	-0.19316	0.0216294	1.5e-19	0.000213549
rs4144782	2	119601872	A	G	0.607417	-0.0499582	0.00211744	7.4e-127	0.00119032
rs144832051	2	119610406	C	T	0.978621	-0.20272	0.00715115	9.6e-187	0.00171959
2:119617757_GTTT_G	2	119617757	GTTT	G	0.415834	0.0405826	0.00219837	2.2e-77	0.00080014
rs772466360	2	119620958	C	CTTCT	0.734791	0.0327844	0.00261178	5.2e-39	0.000418906
rs200400638	2	119748249	C	T	0.996411	-0.271814	0.0214199	4.6e-39	0.000528428
rs12477083	2	129042639	C	A	0.833903	-0.0168769	0.00280039	7.2e-10	7.89028e-05
rs143768697	2	144297521	G	A	0.694965	-0.0168422	0.00232111	1.6e-13	0.000120265
rs6722557	2	145755449	G	C	0.746633	-0.0199309	0.0023728	4.2e-16	0.000150294
rs139860835	2	145793696	A	G	0.985503	0.0545033	0.00862775	1.7e-11	8.48812e-05
rs769079	2	149319042	C	T	0.441051	-0.0119292	0.00211229	5.5e-09	7.01639e-05
rs12614608	2	153331546	G	A	0.723892	0.019116	0.00230781	2.6e-18	0.000146075
rs11392999	2	153554061	G	GT	0.193147	-0.0178246	0.00269237	1.6e-12	9.90266e-05
2:157753693_AATCCCATTTT_A	2	157753693	AATCCCATTTT	A	0.113399	0.0192519	0.00327626	1.6e-09	7.45272e-05
rs2069035	2	160020510	T	C	0.659265	-0.0255014	0.00217455	1.7e-35	0.000292169
rs113193373	2	160106619	G	C	0.460481	-0.0163422	0.00206822	1.7e-15	0.0001327
2:172408827_CA_C	2	172408827	CA	C	0.758867	-0.0179114	0.00243474	3.1e-16	0.000117412
rs10165846	2	176727834	T	C	0.504901	-0.0135793	0.00206883	1.8e-10	9.21898e-05
rs847147	2	176970659	G	A	0.737856	0.0191972	0.00235535	2.4e-18	0.000142566
rs1900769	2	177486886	G	A	0.773507	-0.0155357	0.00252685	1.2e-10	8.45689e-05
rs76557027	2	177514850	A	T	0.91335	0.023529	0.00366556	9.8e-11	8.7628e-05
rs2594948	2	177526156	C	T	0.311241	0.0127209	0.00222374	6e-09	6.93793e-05
2:181951865_TAA_T	2	181951865	TAA	T	0.304038	0.023372	0.00225678	1.6e-25	0.000231172
rs56118925	2	182155931	G	T	0.641799	-0.0126183	0.00214908	6.2e-09	7.32078e-05
rs10206992	2	183730527	T	G	0.747305	0.0200175	0.00236799	1.8e-18	0.000151337
rs13384908	2	188190475	G	A	0.795999	-0.0172199	0.00255878	1.5e-11	9.63022e-05
rs1465305	2	191585392	C	G	0.69644	0.0141665	0.00224246	7.5e-12	8.48562e-05
rs2375683	2	197070713	G	T	0.750856	0.0177979	0.00238379	2.1e-15	0.000118515
2:197406455_GT_G	2	197406455	GT	G	0.855387	0.0230053	0.00296576	8.1e-16	0.000130935
rs1563486	2	199887147	T	C	0.673014	0.0131904	0.00220508	1e-09	7.65771e-05
rs13017811	2	200464560	G	A	0.82984	0.0355628	0.00274409	1.2e-42	0.000357169
rs112621228	2	202748440	C	T	0.962688	-0.0445109	0.00549911	6.3e-17	0.00014233
rs7576585	2	202764209	C	G	0.950273	0.0382176	0.004762	7.6e-17	0.000138038
rs11679645	2	202779950	T	C	0.751244	0.0300454	0.00244305	3.7e-35	0.000337396
rs6716216	2	202803881	A	G	0.878086	-0.037101	0.00315052	5.2e-35	0.000294708
rs10931982	2	202832130	T	C	0.226003	-0.0584752	0.00246921	1.8e-129	0.00119626
rs949782	2	202958208	C	A	0.701468	-0.0278403	0.0022671	4.5e-37	0.000324621
2:203049106_CA_C	2	203049106	CA	C	0.514259	0.0179004	0.00211501	1.5e-18	0.000160082
rs17594321	2	203695265	A	T	0.519419	0.0132033	0.00207013	9.6e-11	8.70321e-05
rs17537246	2	208744554	T	G	0.935643	-0.0281039	0.00430554	4.3e-10	9.51194e-05
rs16857021	2	218070164	T	A	0.8406	-0.0289097	0.00282753	4.7e-25	0.000223973
rs13392670	2	218615136	A	G	0.922848	0.0271954	0.00404519	3.8e-12	0.000105317
rs2382818	2	219155907	A	T	0.583383	-0.0121303	0.0021044	6.4e-09	7.1526e-05
rs78058190	2	219699999	G	A	0.949593	-0.0382172	0.00531118	3.4e-13	0.000139822
rs3815970	2	222320066	G	A	0.507956	-0.016097	0.00206917	1.6e-15	0.000129524
rs78034425	2	227650985	C	T	0.917045	-0.0222964	0.00374171	1.1e-09	7.56367e-05
rs2675952	2	233790522	T	A	0.566477	-0.0215749	0.00209678	7.1e-26	0.000228624
rs6759927	2	238227919	A	G	0.683241	-0.0204298	0.00221572	5.7e-23	0.00018066
rs7571898	2	238383028	T	C	0.765359	0.0234286	0.00243205	1.3e-24	0.000197148
rs775903554	3	4510193	GCAGT	G	0.685791	0.0146054	0.00225203	2.6e-10	9.19321e-05
rs346068	3	11302933	A	G	0.172956	0.0256687	0.00275659	5.8e-24	0.000188496
3:11310174_TA_T	3	11310174	TA	T	0.175082	0.0258614	0.00274961	3.8e-24	0.000193191
rs7616006	3	12267648	A	G	0.580259	-0.014717	0.0021103	1.3e-13	0.000105505
rs146206942	3	19998856	C	G	0.987607	0.076553	0.00943834	2.2e-16	0.000143455
rs2043581	3	24491744	C	A	0.43294	-0.0135843	0.00213072	4.4e-10	9.06069e-05
rs1286662	3	25528376	A	G	0.816011	0.0232879	0.00268925	4.3e-17	0.000162847
rs28373428	3	29459967	G	A	0.855004	-0.0220506	0.00296156	1.6e-14	0.000120558
rs6549962	3	30029027	T	C	0.776176	-0.015053	0.00249963	2.4e-09	7.87305e-05
rs542768261	3	30735330	G	GT	0.668934	0.0177537	0.00221527	9.7e-16	0.000139606
rs4909017	3	32937596	C	T	0.442578	0.0170336	0.00209394	1.1e-16	0.000143158
rs150059308	3	33494991	G	A	0.988199	0.0708874	0.0096547	2.6e-14	0.000117201
rs199281	3	37507615	T	C	0.151207	-0.017885	0.0029077	1.4e-09	8.21073e-05
rs9829061	3	40999999	G	A	0.867338	0.0270907	0.00316688	5.4e-19	0.000168891
rs74895481	3	41042249	G	A	0.925226	-0.0427879	0.00439148	1.4e-23	0.000253321
rs370387	3	41123984	G	A	0.445568	-0.0476057	0.00209178	1.8e-126	0.00111972
3:41170868_AAT_A	3	41170868	AAT	A	0.589144	0.0486249	0.00224759	1.1e-115	0.00114461
rs78046470	3	41170870	T	A	0.892143	0.0566996	0.00461311	6.5e-40	0.00061869
3:46414943_TACAGTCAGTATCAATTCTGGAAGAATTTCCAG_T	3	46414943	TACAGTCAGTATCAATTCTGGAAGAATTTCCAG	T	0.905877	-0.0285386	0.00389701	7e-14	0.000138887
3:47193317_CA_C	3	47193317	CA	C	0.450451	-0.0176213	0.0022382	1.7e-15	0.00015373
rs4858894	3	47484953	C	G	0.375388	-0.0134182	0.00217833	4.8e-09	8.44324e-05
3:47494415_AC_A	3	47494415	AC	A	0.909021	-0.040229	0.00487032	2.6e-18	0.000267685
rs555591583	3	48652755	C	T	0.984514	-0.120552	0.0167274	9e-14	0.000443139
3:48771848_TGG_T	3	48771848	TGG	T	0.852552	-0.0363817	0.00492322	1e-13	0.000332779
3:48908247_AT_A	3	48908247	AT	A	0.408448	-0.0185772	0.00238785	7.2e-16	0.000166771
3:49442690_CAAAAAAAAAAAA_C	3	49442690	CAAAAAAAAAAAA	C	0.0426515	0.0722931	0.00922718	7.8e-16	0.000426804
rs181404049	3	49771820	G	A	0.968637	-0.0773966	0.00832317	3.1e-23	0.000363959
rs6800913	3	50052867	T	A	0.250419	0.0285482	0.00249461	8.2e-33	0.000305966
rs560920364	3	50974243	A	T	0.986967	-0.135998	0.0177448	1.4e-15	0.000475819
rs543226695	3	51351541	T	G	0.983092	-0.0900384	0.0125139	4.9e-13	0.000269508
rs757200782	3	55840356	C	CAA	0.903544	-0.0259832	0.00361252	6.9e-12	0.000117678
rs11915970	3	56169965	A	T	0.881572	-0.0453374	0.00322898	3.9e-44	0.000429196
rs4974186	3	56263534	G	T	0.449685	-0.0259077	0.00210166	5.4e-39	0.000332206
3:57131032_CA_C	3	57131032	CA	C	0.830886	-0.0186625	0.00295244	5.8e-11	9.78793e-05
3:57706829_ATT_A	3	57706829	ATT	A	0.217812	-0.0182543	0.00257637	1.9e-13	0.000113541
rs2306272	3	66434643	T	C	0.713743	-0.0142085	0.00230024	4.2e-09	8.24944e-05
rs13088318	3	101242751	A	G	0.663372	-0.0188206	0.00220216	2.6e-17	0.000158199
3:113390612_CTT_C	3	113390612	CTT	C	0.644735	-0.014329	0.00218427	6.2e-12	9.40579e-05
rs11719201	3	123068744	C	T	0.753406	0.0148717	0.00241979	5.1e-11	8.21794e-05
rs1991431	3	141133450	G	A	0.557792	0.0171514	0.00210248	1.5e-17	0.00014512
3:142151049_AATTAAT_A	3	142151049	AATTAAT	A	0.892957	0.0236779	0.00347174	1.9e-10	0.000107178
rs147652399	3	142614977	T	C	0.848872	0.0157975	0.0029041	1.6e-09	6.40315e-05
rs62271373	3	150066540	T	A	0.940257	-0.0291193	0.00447444	5.6e-12	9.52633e-05
rs7636965	3	156418404	T	C	0.444303	-0.0181061	0.00210013	3.1e-18	0.000161881
rs6803350	3	156440917	G	C	0.951413	0.0543208	0.00487195	6e-32	0.000272804
rs11442947	3	156468780	T	TA	0.550168	0.0141821	0.00209974	1.8e-11	9.95536e-05
rs62275807	3	156641796	G	A	0.892634	0.0365578	0.00336794	2.1e-29	0.000256171
rs7650127	3	156642634	A	G	0.827957	0.0457915	0.00276183	5.3e-67	0.000597372
rs6441103	3	156643385	T	C	0.827782	0.0458084	0.00276144	5e-67	0.000598294
rs767487038	3	156697090	TATAAC	T	0.877077	0.0533448	0.00322341	2.8e-64	0.0006136
rs62275836	3	156698287	C	A	0.908131	0.0318187	0.00368003	1.3e-17	0.000168932
rs900399	3	156798732	A	G	0.600109	0.0320278	0.00212751	1.4e-55	0.00049233
rs6803137	3	168631225	A	G	0.776692	0.0203471	0.00250457	2.4e-17	0.000143611
rs9290351	3	168692352	G	T	0.878482	-0.0250314	0.00318291	7.3e-16	0.000133775
rs9861426	3	169250603	G	C	0.646509	0.015027	0.00217449	5e-12	0.000103211
rs10937104	3	182670993	A	T	0.329132	-0.0128668	0.00221776	1.1e-09	7.31103e-05
rs558655224	3	185522224	C	CA	0.687663	-0.0157385	0.00225197	4.4e-12	0.000106403
rs4686419	3	186004526	T	C	0.695944	-0.0160691	0.00228003	8.4e-13	0.00010928
rs13070996	3	196906074	G	T	0.722039	0.0146126	0.00232286	3.3e-11	8.57096e-05
rs142971131	4	748124	G	A	0.987097	0.112853	0.0116176	9.4e-22	0.000324419
4:854068_TGAC_T	4	854068	TGAC	T	0.979051	0.103865	0.00898938	1.5e-31	0.000442524
rs547595393	4	966007	C	T	0.994471	0.170347	0.0187554	1.4e-20	0.000319108
rs150523349	4	996501	G	GC	0.854075	0.0742979	0.00298377	2.4e-152	0.00137597
rs6829296	4	1000138	C	G	0.64069	0.0130438	0.00217184	2.1e-10	7.83349e-05
rs4505759	4	1003022	C	T	0.693487	-0.0618336	0.00226526	1.2e-179	0.00162542
rs143614383	4	1006913	C	G	0.995368	-0.153246	0.0159062	2.8e-23	0.000216551
rs111632154	4	1012300	T	C	0.952432	0.0888448	0.00493748	9.6e-75	0.000715225
rs559902765	4	1016980	C	G	0.994019	0.181908	0.020421	6e-19	0.000393461
rs112688410	4	1036300	C	T	0.853101	0.0320319	0.00297098	1e-29	0.000257167
rs11724371	4	1052125	T	C	0.2163	0.0235768	0.00253485	4.6e-21	0.000188454
rs374783381	4	1112397	C	CA	0.883538	0.0271677	0.00343988	1.6e-15	0.000151896
rs368222845	4	1392236	G	A	0.995172	0.182344	0.0234519	2.7e-16	0.000319506
rs1902177	4	15099037	C	T	0.418258	-0.016183	0.00210948	1.5e-14	0.000127445
rs2174633	4	17917781	A	C	0.26369	-0.0162694	0.00236488	1.8e-12	0.000102784
rs1386625	4	38361120	A	G	0.0970105	0.049771	0.00355868	6.9e-49	0.000433994
rs56921221	4	54352164	G	A	0.850946	-0.025981	0.00292435	5.5e-20	0.000171233
rs4864530	4	55895880	C	T	0.609576	0.0154278	0.00213821	1.1e-14	0.000113293
4:57756831_GA_G	4	57756831	GA	G	0.610893	-0.0219606	0.00214933	4.2e-24	0.000229273
rs3775770	4	70724270	C	T	0.7043	0.0127911	0.0022766	1.8e-09	6.81483e-05
rs11729023	4	71991184	C	T	0.879432	-0.0272477	0.00320468	7.6e-19	0.000157443
rs11930058	4	77904310	G	A	0.844653	0.0251604	0.0028729	1.1e-19	0.000166129
rs11731267	4	84469852	C	T	0.86704	-0.0207114	0.00308127	2.7e-12	9.89029e-05
rs17010957	4	86719165	T	C	0.851673	-0.0316563	0.00295464	1.4e-29	0.000253188
rs11434868	4	87956716	G	GA	0.420612	0.0220249	0.00212502	3.3e-26	0.000236434
rs765387398	4	88065156	G	A	0.998661	0.208736	0.0295938	1e-13	0.000116526
rs4287972	4	88645798	C	T	0.501958	-0.0230613	0.00208426	5e-30	0.000265908
rs17013212	4	88754060	C	T	0.86028	0.0402501	0.00300077	8.3e-43	0.00038946
rs1463103	4	88794878	G	C	0.143851	0.0428281	0.00296287	1.2e-51	0.000451804
rs11934731	4	88831249	G	A	0.32002	0.0379469	0.00223545	2.3e-70	0.000626694
rs59878318	4	88846766	G	T	0.506379	0.0302616	0.00230336	5.1e-40	0.000457808
rs34166467	4	95158649	T	TA	0.428665	-0.0198763	0.00213361	5.9e-22	0.000193513
rs28733161	4	95175869	T	C	0.82211	-0.0298387	0.00273499	4.9e-30	0.000260418
rs71581597	4	95557567	C	CA	0.673272	0.0188892	0.00250171	3.7e-15	0.000156976
rs565931739	4	104590005	C	CA	0.83525	0.0187828	0.00287021	2.7e-12	9.7094e-05
rs528845403	4	104780790	A	AATGTGT	0.989983	0.0660313	0.0112858	8.3e-11	8.64759e-05
rs62331124	4	106034930	A	C	0.686746	-0.0187747	0.00225295	2.7e-17	0.000151659
rs66758084	4	106045496	A	G	0.818754	0.0223789	0.00273672	7.4e-18	0.000148638
rs1393824	4	109171067	C	A	0.525763	0.0115372	0.0020863	3e-09	6.63768e-05
rs56055826	4	119789424	T	A	0.939746	0.0254409	0.00441069	5.1e-09	7.32979e-05
rs77431781	4	124534992	A	T	0.923715	0.0244211	0.00402233	8.4e-11	8.405e-05
rs34571451	4	125540492	T	TA	0.688821	-0.015249	0.00226138	8.1e-13	9.96849e-05
rs313146	4	127528392	G	A	0.671452	-0.015571	0.00222866	7.5e-14	0.000106974
rs72921443	4	127528506	C	T	0.91981	0.0282767	0.00382996	3.3e-15	0.000117952
rs4576021	4	145713769	C	T	0.580659	-0.0207263	0.00211784	1.2e-23	0.0002092
rs6844904	4	146167657	G	A	0.168255	-0.0343781	0.00278532	1.9e-37	0.00033079
rs6816078	4	146835790	C	A	0.595844	0.0187174	0.00212203	2.9e-18	0.000168734
4:157511450_GT_G	4	157511450	GT	G	0.611246	0.0203455	0.00214643	1e-21	0.000196724
rs11100606	4	166270842	A	G	0.689833	-0.0160602	0.0022584	7.2e-12	0.000110375
rs4695886	4	174723835	T	C	0.593397	-0.0129689	0.00213276	2.1e-09	8.11619e-05
rs1396190	4	175131374	C	T	0.711227	-0.0128053	0.00228979	5.3e-09	6.73557e-05
rs907366	4	184212220	G	A	0.241816	0.0156106	0.00242802	7.7e-12	8.93571e-05
rs327098	4	187639283	G	A	0.803026	-0.0169416	0.00261482	1.3e-10	9.07982e-05
rs6870556	5	31134837	G	A	0.375507	0.0191099	0.002151	1.5e-19	0.000171274
rs1428968	5	36646946	C	T	0.819619	-0.0231386	0.00271286	9.5e-19	0.000158309
rs13179493	5	39426307	T	C	0.707768	-0.0323912	0.00231933	4.2e-49	0.000434013
rs3812039	5	39426327	T	C	0.721791	0.0323144	0.00233175	2e-45	0.000419377
rs13189192	5	41743677	G	A	0.837682	-0.0229165	0.00295478	1e-14	0.000142815
rs10035253	5	42215812	G	T	0.32013	0.0202138	0.00223753	3.4e-21	0.00017786
rs11741390	5	42525352	C	T	0.533866	-0.0225073	0.00208806	4.4e-29	0.000252127
rs36110641	5	42647676	C	CAA	0.824256	-0.0192149	0.00280017	1.5e-12	0.000106967
rs4637559	5	42697768	G	C	0.249825	0.0153008	0.00240692	8.9e-12	8.77519e-05
rs35352645	5	42756121	C	CT	0.229334	0.017085	0.0026695	1.1e-11	0.00010318
rs6870880	5	50256207	G	A	0.593281	0.0168542	0.00213014	5.3e-15	0.000137089
rs7349819	5	50590195	G	T	0.574601	0.0176002	0.00211386	5.2e-16	0.000151436
rs77972482	5	50791087	T	A	0.900104	-0.0360542	0.00347472	1.6e-24	0.000233767
rs5867818	5	51948395	A	AT	0.18837	0.0208375	0.00266272	5.5e-17	0.000132767
rs4074793	5	52193125	A	G	0.92455	-0.032639	0.00394478	4.1e-17	0.000148626
rs11398788	5	54795516	A	AT	0.10382	-0.033151	0.00340957	3.6e-23	0.000204503
rs75567174	5	54810466	T	C	0.905802	-0.0363671	0.00356443	1.2e-24	0.000225695
rs67820074	5	55009278	A	G	0.955451	-0.0351694	0.00504499	3.6e-12	0.000105295
rs6449774	5	64451301	G	A	0.446551	-0.012717	0.00210733	2.4e-09	7.9937e-05
rs7378773	5	67104334	T	C	0.276524	0.0139554	0.00233666	4.3e-09	7.79241e-05
rs246562	5	71810246	G	A	0.81176	-0.0153251	0.00266673	4.8e-09	7.17755e-05
rs155511	5	72236003	G	A	0.463539	0.0125842	0.00208832	2.2e-09	7.876e-05
rs10805874	5	72607981	T	A	0.309167	0.0213493	0.00227042	3.2e-21	0.000194699
rs392079	5	73441848	G	C	0.647543	0.0132235	0.00218558	2e-09	7.98174e-05
rs10065639	5	73690349	A	G	0.752689	-0.015239	0.002419	1.5e-11	8.64574e-05
rs10045962	5	78217695	C	T	0.652028	-0.0131696	0.0021938	1.1e-10	7.8702e-05
rs147399060	5	80281743	G	GGT	0.722279	-0.0304938	0.00235735	1.4e-41	0.00037305
rs35742750	5	82431210	C	CT	0.572434	0.0132787	0.00213382	6.6e-11	8.63117e-05
rs17585072	5	89023793	A	G	0.965427	-0.0356646	0.00568614	2.8e-10	8.49105e-05
rs3922468	5	95613007	G	A	0.331466	-0.0167826	0.00222028	2.8e-15	0.000124828
rs758752368	5	100015927	TG	T	0.517768	-0.0166788	0.00208892	9.4e-17	0.000138916
rs1045706	5	108714298	T	C	0.407335	-0.0148538	0.00211502	1.6e-12	0.000106529
rs6864688	5	112054086	C	T	0.467834	0.0145225	0.00208701	1.9e-13	0.000105015
rs9327298	5	122850321	G	A	0.742284	0.0253953	0.00238053	5.1e-28	0.000246745
rs42916	5	127560659	C	A	0.260272	-0.0219277	0.00237873	2.8e-20	0.000185147
rs4836373	5	127787610	T	C	0.497647	0.0225787	0.00208926	3.6e-29	0.000254893
rs564789596	5	127941282	T	C	0.886253	0.0261111	0.00329242	2.9e-15	0.000137461
rs571173399	5	132441799	T	G	0.7678	-0.0242276	0.0024838	3.2e-24	0.000209296
rs31211	5	134363145	G	A	0.749122	-0.0174344	0.00240319	3e-13	0.000114251
rs6882422	5	135430668	G	A	0.88321	0.0301471	0.00326154	5.2e-22	0.000187495
rs9324890	5	142048307	A	G	0.723809	-0.0139783	0.00233545	1.4e-09	7.81218e-05
rs2074636	5	142586694	A	G	0.684182	0.022456	0.00227209	2e-25	0.000217923
rs6862531	5	143085953	G	A	0.812421	-0.0166798	0.00266564	9.1e-11	8.47963e-05
rs368510	5	148787469	G	A	0.667357	-0.0282248	0.00220672	6.8e-40	0.000353695
rs7444282	5	154045280	G	A	0.795446	0.0194307	0.00258139	2e-15	0.000122864
rs6873969	5	156627387	G	A	0.536289	-0.0128631	0.00216996	1.4e-09	8.22939e-05
rs6885822	5	158263144	G	A	0.839753	0.0256839	0.00283769	3.2e-20	0.000177539
rs4868145	5	171577689	T	C	0.586559	-0.0122899	0.00212577	4.5e-09	7.32575e-05
rs35774141	5	173000834	A	ACT	0.395657	-0.0185889	0.00214453	1.3e-18	0.000165249
rs77822827	5	173378316	T	TA	0.698547	-0.0131409	0.00227063	1e-09	7.2727e-05
rs335424	5	176975140	C	G	0.537859	0.0135462	0.00212714	3.1e-10	9.12237e-05
rs141046527	6	1615657	T	TGCTGGGGGGACCTGGGCGA	0.57189	-0.0131069	0.0021092	1.9e-11	8.41197e-05
rs9392366	6	2101913	G	A	0.669527	0.0140373	0.00221242	8.1e-10	8.71969e-05
rs6904395	6	2443181	T	C	0.711276	0.016838	0.00228872	1.8e-13	0.000116448
rs4320420	6	2496046	G	A	0.511643	0.0263349	0.00206947	4.5e-39	0.000346575
rs1254725	6	2580727	T	C	0.635543	0.0154375	0.00216899	6.4e-12	0.000110402
rs6938004	6	2729604	C	T	0.415616	0.0131161	0.0020989	1.2e-10	8.35661e-05
rs9378485	6	6961571	T	C	0.613084	0.0160898	0.00212578	1.7e-15	0.00012282
rs525678	6	7058857	A	G	0.0375775	0.0710899	0.00546624	1.1e-41	0.000365544
rs9379084	6	7231843	G	A	0.88414	0.0389254	0.00332461	4.7e-36	0.000310421
rs2842352	6	7251037	C	T	0.851297	0.0189983	0.00291633	1.8e-11	9.13819e-05
rs9466056	6	21384613	A	G	0.379894	-0.0119076	0.00212156	5.2e-09	6.68047e-05
rs7762532	6	21806789	C	T	0.800152	-0.018944	0.0026028	8e-13	0.000114775
rs74971894	6	21888517	A	G	0.884402	0.0426314	0.00322976	3.5e-40	0.000371612
rs2858996	6	26094026	G	T	0.765442	0.0151712	0.00243484	7e-10	8.2648e-05
rs4711112	6	26470862	A	G	0.210809	-0.0190246	0.0025286	1.9e-13	0.000120429
rs540860509	6	27244243	C	T	0.936831	-0.0468704	0.00653071	1.3e-10	0.000260012
rs3130825	6	29223493	G	C	0.87947	-0.0208387	0.00317377	1.6e-09	9.20635e-05
rs28367493	6	29644337	A	T	0.809284	-0.0217788	0.00296537	1.6e-11	0.000146415
rs201604542	6	29788957	T	C	0.99114	0.105892	0.0150623	5.6e-13	0.000196936
rs9258644	6	29822082	A	T	0.813026	-0.0268138	0.00302296	2.5e-17	0.000218591
rs1071742	6	29910759	T	C	0.715551	-0.0224179	0.00244144	2e-17	0.000204581
rs7768235	6	29923248	G	C	0.484733	0.0219262	0.00208885	6.5e-25	0.000240155
rs9261281	6	30035341	G	T	0.97166	0.0377761	0.00622433	1.2e-09	7.8592e-05
rs6920820	6	30969938	C	G	0.987532	0.0557301	0.00930929	2.2e-09	7.64817e-05
rs114029601	6	31329029	C	T	0.986112	0.0823935	0.0112534	2.4e-13	0.000185944
rs13220896	6	31369662	G	A	0.959367	0.0407174	0.0052275	4.3e-15	0.000129257
rs2894381	6	32682228	G	A	0.7902	-0.0142926	0.00258179	5.6e-09	6.77322e-05
rs9296149	6	35345814	T	G	0.967925	0.0401859	0.00586891	1.9e-12	0.000100273
rs9296151	6	35379770	G	A	0.963591	0.0461263	0.00552353	9e-17	0.000149289
rs2076168	6	35389999	G	T	0.217211	-0.0157943	0.00250948	3.9e-10	8.48315e-05
rs11755391	6	35420967	G	A	0.390124	-0.0122178	0.00212073	4.7e-09	7.1033e-05
rs2504101	6	39827490	A	G	0.419097	0.0144852	0.00210142	3.2e-12	0.000102164
rs998584	6	43757896	C	A	0.517204	-0.0147753	0.00206934	8.2e-15	0.000109026
rs10948100	6	43855451	G	C	0.367208	-0.0124999	0.00214602	4.1e-09	7.26133e-05
rs45573936	6	44198362	T	C	0.972666	0.0397511	0.0063307	2.8e-09	8.40224e-05
rs79036082	6	44534382	T	G	0.921816	0.0265978	0.00386656	3e-11	0.000101973
rs491616	6	44562107	G	T	0.914406	0.024914	0.00375301	4.7e-10	9.71626e-05
rs575445	6	44562693	C	G	0.459225	-0.0143973	0.00207417	2.3e-12	0.000102952
rs11442031	6	44612801	T	TG	0.69302	-0.0126953	0.00227125	2.2e-09	6.85759e-05
rs1283935	6	44632969	T	G	0.0886634	-0.0402605	0.00365172	1.7e-28	0.000261946
rs112360218	6	44744183	T	TGATGGATG	0.809014	0.0325713	0.00270096	1.7e-36	0.000327837
rs5875893	6	44781313	G	GA	0.541305	-0.033913	0.00211339	2.7e-60	0.000571121
rs553012877	6	44855668	G	A	0.997007	0.215506	0.0254463	6.2e-17	0.000277175
rs183066049	6	45060471	C	T	0.993327	0.155828	0.0140145	3.8e-29	0.00032191
rs75230517	6	45106438	G	C	0.94895	0.107672	0.0046998	2.7e-125	0.00112325
rs796831889	6	45183951	A	G	0.982457	0.085711	0.00984397	5e-21	0.000253233
6:45190454_CAT_C	6	45190454	CAT	C	0.99455	0.179943	0.0170966	2.6e-29	0.000351013
rs574055998	6	45277715	C	T	0.996556	0.122499	0.0189431	3e-10	0.000103005
rs6941594	6	45857952	G	A	0.586888	0.0133542	0.00209918	7.9e-11	8.64746e-05
6:53799235_TA_T	6	53799235	TA	T	0.381165	-0.0171947	0.00216308	2.5e-17	0.000139478
rs10807491	6	55268812	A	G	0.253267	0.0168241	0.0023756	2.2e-14	0.000107063
rs4334972	6	55349136	G	C	0.789344	-0.0170956	0.00253747	9.2e-12	9.71939e-05
rs77606322	6	55472628	T	G	0.967007	-0.0481123	0.00578043	8.9e-16	0.000147704
rs116697020	6	55521629	G	A	0.97749	0.043537	0.00694869	6.9e-11	8.34132e-05
rs541928175	6	55604267	C	T	0.935528	-0.0573308	0.00426136	2.3e-42	0.000396492
rs150445982	6	55676621	C	T	0.977225	-0.103724	0.00724849	5.5e-49	0.000478896
rs9475474	6	55785242	A	G	0.961409	0.0444693	0.00540517	1.2e-16	0.000146739
6:55796852_AT_A	6	55796852	AT	A	0.983513	-0.148135	0.00969946	4.2e-55	0.000711651
rs550300074	6	55878914	T	TCAG	0.986085	-0.155532	0.0107107	3.2e-52	0.000663846
rs72874231	6	55925194	G	A	0.941854	-0.0531478	0.00454596	8.8e-33	0.000309388
rs79455288	6	56323550	G	T	0.950373	0.0370735	0.00476158	1.2e-15	0.000129649
rs112462597	6	56407806	C	G	0.949179	0.0372222	0.00470154	5.9e-16	0.000133667
rs79717953	6	74404771	C	T	0.990886	0.0914096	0.0111727	2.3e-16	0.00015092
rs6453700	6	74495257	A	G	0.64632	0.0145758	0.00216077	5.8e-13	9.71299e-05
6:74499139_GT_G	6	74499139	GT	G	0.485463	0.0260552	0.00206415	1.1e-40	0.00033915
rs181986557	6	74962192	C	T	0.99713	-0.132928	0.0209149	1.1e-12	0.000101134
6:82463477_CTT_C	6	82463477	CTT	C	0.685365	-0.0130685	0.00222975	2e-09	7.36564e-05
6:83759052_TG_T	6	83759052	TG	T	0.300931	0.0257005	0.00225474	2e-31	0.000277907
rs746406027	6	85274106	CACTT	C	0.759412	0.0175685	0.0024228	2.3e-11	0.000112785
rs9344512	6	86077751	C	A	0.737245	-0.0157182	0.00235873	7.9e-12	9.57191e-05
rs314261	6	105453417	A	C	0.440635	-0.0133438	0.00208153	2.9e-10	8.77735e-05
rs72945685	6	107962470	C	T	0.888742	-0.0262775	0.00328817	6.9e-18	0.000136554
rs77243579	6	109640864	A	G	0.658506	-0.0134244	0.00221689	2.6e-10	8.10518e-05
rs9386909	6	110842550	C	T	0.514794	0.0122358	0.00206943	2.6e-09	7.47919e-05
rs1761622	6	118621078	C	T	0.882372	-0.018611	0.00322505	6.4e-09	7.19005e-05
rs112521333	6	122136119	T	TA	0.901966	0.0288678	0.00348055	2.9e-16	0.000147375
rs1268119	6	126375581	T	C	0.279996	-0.0161574	0.00230892	1e-12	0.000105259
rs9375477	6	127204623	A	G	0.844769	-0.0356555	0.00286118	7.7e-38	0.000333426
rs727331	6	127399056	T	C	0.708708	-0.0201596	0.00227233	2.5e-19	0.000167799
rs140418154	6	127412752	C	CA	0.889177	0.0608081	0.00345904	3.1e-74	0.000728737
rs2800704	6	127431488	A	G	0.904534	-0.0482303	0.00456329	3.9e-28	0.000401739
rs147697812	6	127438966	A	G	0.957784	-0.0796983	0.00729314	1.7e-28	0.000513656
6:127439017_GGAAGGAAA_G	6	127439017	GGAAGGAAA	G	0.861782	-0.074534	0.00387682	6.7e-86	0.00132343
rs9482773	6	127459552	G	C	0.523222	-0.0825259	0.00207006	0	0.00339792
6:127789290_CA_C	6	127789290	CA	C	0.296495	-0.0205996	0.00250146	9.3e-18	0.000177024
rs9401974	6	127884124	C	G	0.4945	0.0128816	0.00206767	1.5e-11	8.29578e-05
rs113898003	6	130341235	T	C	0.736617	-0.0259576	0.00234368	7.6e-31	0.00026145
rs9375695	6	130358944	G	T	0.30292	-0.0258385	0.00224722	8.7e-33	0.000281952
rs536124151	6	131138645	T	TAA	0.830094	-0.0207392	0.00277678	3.7e-13	0.000121325
rs4895901	6	131307182	T	G	0.626082	0.0275732	0.00213184	7.4e-40	0.000355969
rs17061975	6	133240019	T	A	0.912743	-0.0354202	0.0036858	1.8e-23	0.000199839
6:133339485_GA_G	6	133339485	GA	G	0.334988	0.0418907	0.00219396	4.8e-87	0.000781851
rs4895959	6	133575875	C	A	0.457948	0.0588105	0.00207474	8.3e-190	0.00171711
rs761390078	6	133603742	A	ATATG	0.705143	0.0468823	0.00261408	1.2e-78	0.00091398
rs2235485	6	133703325	A	G	0.838459	0.0264314	0.0028056	2.7e-22	0.00018925
rs3822939	6	133849789	A	G	0.462325	0.0294909	0.00207153	1.1e-49	0.000432388
rs9376164	6	136227254	G	A	0.865572	0.0328638	0.00303151	1.7e-30	0.000251338
rs12209685	6	136228675	C	T	0.619992	-0.0215522	0.00214124	7.7e-27	0.000218873
rs536371583	6	139616716	T	TG	0.832317	0.019629	0.00284555	8.7e-13	0.000107548
rs6935952	6	148829441	G	A	0.445922	0.0198274	0.00217409	1.8e-17	0.000194264
rs367763803	6	151715281	G	GA	0.378163	0.0174612	0.00225771	1.1e-15	0.000143395
rs373421938	6	151759930	C	CTT	0.912468	0.0275566	0.0038978	9.3e-14	0.000121301
rs4455680	6	151863505	G	A	0.778593	-0.0590047	0.0025997	2.4e-119	0.00120034
rs11428711	6	151892456	A	AT	0.233895	-0.0430656	0.0024627	1.6e-73	0.000664661
rs1871859	6	151898506	C	T	0.876842	0.105936	0.00314524	5.2e-255	0.00242382
rs1891002	6	151900047	T	A	0.710451	0.0883992	0.00227371	0	0.00321501
rs544235145	6	151952411	T	C	0.995733	0.213029	0.0178936	4.9e-34	0.000385632
rs371672993	6	151956755	GCACATGCACA	G	0.611117	-0.0594769	0.002181	5.8e-178	0.0016814
rs10484920	6	151979047	A	G	0.94224	0.0391271	0.00443909	1.2e-18	0.000166638
rs6905582	6	152000454	G	A	0.829834	0.0619041	0.00277216	2.5e-116	0.00108226
rs2982573	6	152010534	T	C	0.580356	-0.0811273	0.00209324	0	0.00320582
rs1890010	6	152085275	C	T	0.291135	-0.0477196	0.00227326	1.1e-103	0.0009399
rs115192536	6	152100932	G	A	0.932523	-0.0533281	0.00432595	1.2e-37	0.000357897
rs2234693	6	152163335	T	C	0.543176	-0.0183545	0.00207032	3.5e-20	0.000167188
rs547908752	6	152220787	C	T	0.979185	0.0796626	0.00738594	2.1e-27	0.00025869
rs2813495	6	152476952	G	C	0.224086	-0.0146959	0.00247268	2e-09	7.51019e-05
rs557408368	6	152552919	A	G	0.950921	0.0358428	0.00543424	1.4e-11	0.000119915
rs17215781	6	152570274	A	G	0.925541	-0.029709	0.00392955	8.5e-14	0.000121652
rs633891	6	152592751	C	T	0.562958	0.0164718	0.00210163	9.4e-16	0.000133509
rs12196629	6	155329403	C	T	0.839976	-0.0288395	0.00282655	6e-26	0.000223593
rs9397763	6	155342597	T	C	0.895644	-0.0222572	0.00346223	6e-10	9.26028e-05
rs62427108	6	155436821	C	T	0.945026	0.024906	0.00454214	3.4e-09	6.44524e-05
rs12214204	6	157390672	A	G	0.830666	0.0176201	0.00276568	3.8e-10	8.73408e-05
rs35267182	6	158875546	C	CA	0.665927	-0.0138877	0.0021919	8.8e-11	8.58141e-05
rs4709746	6	164133001	C	T	0.866245	0.0342644	0.00305351	4.9e-32	0.000272061
rs199528644	6	168128170	G	GTAA	0.897357	-0.0264061	0.00341146	1.9e-14	0.00012845
rs28585071	6	168432467	G	A	0.824464	0.0278591	0.00272457	2.5e-25	0.000224648
rs62429411	7	49672	C	T	0.422274	-0.0137011	0.00213471	6.8e-11	9.15919e-05
rs144787122	7	2296552	A	G	0.996198	0.0958658	0.0167101	3.7e-09	6.9617e-05
rs2969072	7	2530431	A	G	0.325417	0.0140817	0.00219653	7.2e-12	8.70594e-05
rs798544	7	2763102	C	T	0.70271	-0.0139664	0.0022482	2.1e-10	8.14996e-05
rs10232074	7	15300375	C	G	0.79271	-0.0155844	0.00254691	4.6e-11	7.98184e-05
rs73290427	7	15506110	G	T	0.823193	0.0160479	0.00269975	2.2e-09	7.49666e-05
rs111428477	7	15654044	G	GA	0.315471	-0.0283842	0.00223175	4.1e-39	0.000347964
rs6942739	7	15718531	C	T	0.292315	-0.0329709	0.00227694	3.8e-52	0.000449762
rs10278969	7	15957810	G	A	0.33857	0.0165916	0.00217078	4.4e-14	0.000123293
rs772748664	7	18018437	GA	G	0.487035	0.013192	0.00209929	1.7e-10	8.69559e-05
rs12700058	7	19572001	T	G	0.325239	0.0157039	0.00219549	5.4e-14	0.000108242
rs11763267	7	20052860	T	C	0.805743	0.0228397	0.00260385	2.2e-17	0.000163299
rs34786826	7	20360155	T	TA	0.868401	-0.0268132	0.00312504	1.3e-16	0.000164324
rs87	7	25699861	A	G	0.199939	-0.0393006	0.00257747	7.3e-56	0.000494139
rs10245353	7	25858614	C	A	0.809051	-0.0173671	0.00262496	2.7e-11	9.31918e-05
rs7798002	7	25860580	G	T	0.806545	-0.0169036	0.00260483	5.3e-11	8.91655e-05
rs1859165	7	27218468	T	C	0.0943423	0.040046	0.00351978	1.1e-30	0.000274043
rs17472350	7	27231045	T	C	0.977153	0.0765994	0.00700756	7.7e-29	0.000261983
rs17501292	7	27241473	T	G	0.824491	0.0249355	0.00273034	2.5e-22	0.00017995
rs7812039	7	27248891	C	G	0.18514	0.0190471	0.0026434	1.5e-13	0.000109464
rs201865685	7	27653025	AT	A	0.846619	0.0319127	0.00292307	7.5e-28	0.000264495
rs2040666	7	27968193	A	G	0.710705	-0.0314933	0.00226784	3.8e-44	0.000407846
rs10239787	7	27970153	C	T	0.670609	0.0324828	0.00219309	5.2e-49	0.000466142
rs71539572	7	28609388	C	A	0.773615	-0.0220222	0.00245995	4.5e-20	0.000169873
rs982948	7	28708864	G	A	0.57151	0.0139173	0.00214582	1.9e-11	9.48647e-05
rs757980	7	28725536	G	A	0.247629	0.0398868	0.00240713	3.6e-64	0.000592819
7:28830059_GAGAGAGAGAGAGAGAGAGAT_G	7	28830059	GAGAGAGAGAGAGAGAGAGAT	G	0.562152	-0.0215915	0.00236428	4e-20	0.000229495
rs62459989	7	29853084	C	T	0.820811	-0.0184612	0.00268998	4.5e-13	0.000100255
rs28362709	7	30955539	G	T	0.771073	0.0451269	0.00245392	2e-80	0.000718941
rs564512580	7	37651804	C	G	0.994973	-0.152658	0.0207295	6.2e-14	0.000233125
rs575416182	7	37735631	A	G	0.995841	-0.211863	0.0223946	2.4e-22	0.000371808
rs548948244	7	37887288	C	T	0.994202	-0.189802	0.0185719	8.9e-26	0.000415321
rs10264106	7	37947818	A	C	0.813689	-0.0516466	0.00264134	5.7e-85	0.000808743
rs2598095	7	37985998	G	A	0.478127	0.0168019	0.00206849	3e-17	0.000140882
rs200039274	7	38077359	A	G	0.936835	0.060475	0.00507693	8.9e-35	0.000432834
rs5883629	7	38099909	C	CT	0.348529	-0.0631788	0.00215964	6.3e-198	0.00181262
rs758252496	7	38131437	A	AAGC	0.848477	-0.0860655	0.00314617	1.6e-170	0.00190461
rs560632070	7	38133434	C	CA	0.345886	0.0604753	0.00256417	3.6e-127	0.0016549
rs6978070	7	38152923	G	A	0.665044	-0.0651231	0.00219771	1.1e-204	0.00188946
rs76990766	7	42606913	C	T	0.948822	-0.0469767	0.00466248	9.5e-24	0.00021432
rs2330627	7	42696502	G	A	0.796616	-0.0232084	0.0026389	1e-18	0.000174536
rs1548607	7	50901491	A	G	0.672193	0.0208625	0.00218882	5.2e-23	0.000191812
rs377080180	7	74121005	A	AT	0.931302	0.0250922	0.00410134	3.1e-10	8.05642e-05
rs571356	7	83306489	G	A	0.681672	0.016134	0.00220913	1.1e-13	0.00011297
7:83689041_ATT_A	7	83689041	ATT	A	0.8149	-0.0224762	0.00267639	1.2e-16	0.000152401
rs42032	7	92237426	G	A	0.737168	0.024398	0.00234347	1e-26	0.000230666
rs6946681	7	95339454	C	T	0.785667	-0.0147193	0.00250512	5.2e-09	7.29679e-05
rs6966540	7	95727967	T	C	0.627187	-0.0212756	0.00212824	5.3e-24	0.000211681
rs1859279	7	96041731	T	A	0.632253	0.0203126	0.00214628	1.1e-21	0.000191867
rs35108541	7	96143841	A	AC	0.337007	-0.0491762	0.00218001	3.3e-124	0.00108066
rs6465515	7	96157189	T	C	0.319127	0.0290797	0.00221084	2.9e-41	0.000367485
rs17598306	7	96581811	C	T	0.868428	0.029887	0.00303973	5.3e-23	0.000204123
rs1724298	7	96647184	T	C	0.890258	-0.0342394	0.0033077	1.2e-25	0.000229071
rs78456152	7	96718371	G	GT	0.643353	0.0217886	0.00217317	7.8e-24	0.00021786
rs45446698	7	99332948	T	G	0.957985	0.038737	0.00512132	3.8e-15	0.000120794
rs11771799	7	99956436	T	C	0.856042	0.0186926	0.0031016	9e-11	8.61193e-05
rs576872277	7	100510437	G	GA	0.586556	0.0155358	0.00216271	8.2e-13	0.000117064
rs212417	7	105494963	G	A	0.328616	0.030955	0.00219366	5.2e-48	0.000422816
rs35736414	7	118382943	C	T	0.759412	0.0192112	0.0030856	3.7e-09	0.000134862
rs531968440	7	119789791	C	A	0.993818	-0.137415	0.0148705	2.8e-19	0.000232025
rs188411183	7	120368354	A	T	0.913445	-0.0355306	0.00379861	1e-22	0.000199623
7:120439631_A_C	7	120439631	A	C	0.995442	-0.146578	0.0219232	3.9e-11	0.000194966
rs201852005	7	120519267	T	C	0.991683	-0.0973806	0.0133715	3.8e-14	0.000156428
rs529874871	7	120713655	C	G	0.996439	-0.290702	0.0205917	6.8e-50	0.00059972
rs564058644	7	120761041	AC	A	0.468385	0.050126	0.00255769	2.9e-86	0.00125129
rs10214981	7	120816270	A	C	0.442458	0.0792205	0.0024462	3.7e-242	0.00309638
rs774863287	7	120894975	C	CAC	0.737926	-0.0834589	0.00261113	4.8e-237	0.00269409
rs798914	7	120907715	C	G	0.428197	-0.0688288	0.00209377	1.4e-250	0.00231985
rs147514708	7	120935194	A	AACACACAC	0.692034	-0.158009	0.00228165	0	0.010642
rs568261561	7	120948846	C	T	0.994577	-0.22718	0.0163058	1.1e-46	0.000556735
rs2707518	7	120954908	G	T	0.605911	-0.179756	0.00211927	0	0.0154312
rs10668066	7	120965464	G	GCACC	0.753376	-0.188754	0.00239283	0	0.0132394
rs73440215	7	120970753	T	A	0.989869	-0.14947	0.0103283	7.4e-50	0.000448093
7:120970768_GAAAAAAA_G	7	120970768	GAAAAAAA	G	0.60584	-0.125278	0.00222053	0	0.00749566
rs185403618	7	120983853	A	G	0.99638	-0.20019	0.0225907	1.6e-19	0.0002891
rs15427	7	120990120	C	T	0.913857	0.100729	0.00408318	1.6e-134	0.00159749
rs188714751	7	121025086	C	T	0.990268	-0.130862	0.0106202	5.3e-38	0.000330074
7:121026746_CAT_C	7	121026746	CAT	C	0.677594	-0.167251	0.00231071	0	0.0122219
rs189468016	7	121033358	T	C	0.997225	-0.223991	0.0224389	2.4e-24	0.000277682
rs758648676	7	121035306	G	GATAC	0.988612	-0.0814	0.0130396	2.1e-12	0.000149194
rs138090420	7	121036166	T	A	0.964549	-0.15916	0.00600492	5.4e-164	0.00173241
rs747189731	7	121041744	A	G	0.945519	-0.104345	0.00629085	1.7e-69	0.00112173
rs116171174	7	121083968	T	C	0.93462	-0.0805644	0.00557211	4e-50	0.000793225
rs10488055	7	121441980	T	A	0.675471	-0.0180362	0.00220076	4e-16	0.00014262
rs4731052	7	121868676	G	T	0.812683	-0.016264	0.00264623	2e-09	8.05347e-05
rs62621812	7	127015083	G	A	0.979645	0.0953649	0.00748956	6.7e-40	0.000362699
rs534049724	7	127019058	G	GA	0.989759	0.112862	0.0119592	2.5e-23	0.000258224
rs6467589	7	135058554	G	A	0.292774	0.0133743	0.00226059	3.6e-09	7.40735e-05
rs34760444	7	138666955	C	CG	0.741941	0.0180849	0.00235284	2e-14	0.000125242
rs2069442	7	150755205	G	C	0.744483	0.0217593	0.00235375	4.9e-21	0.000180133
7:150926301_CA_C	7	150926301	CA	C	0.312228	0.0143173	0.0022778	3.2e-10	8.80377e-05
rs28665356	7	151120798	T	C	0.745622	0.0157725	0.00237097	1.3e-12	9.4369e-05
rs1982386	8	6371476	C	T	0.756512	0.016772	0.00244209	1.6e-11	0.000103632
rs2442599	8	6394151	G	A	0.27874	-0.0171584	0.00234604	2.1e-13	0.000118379
rs2728901	8	7995383	C	T	0.670953	-0.0370254	0.00351783	8.9e-26	0.000605312
rs139226993	8	7998557	A	G	0.53898	-0.0296112	0.0035114	3.2e-18	0.000435747
rs1712606	8	8035791	C	T	0.553548	-0.0390293	0.00313517	5.8e-37	0.000752907
8:8315011_CCAGAGAGGCT_C	8	8315011	CCAGAGAGGCT	C	0.546202	-0.0399107	0.00210628	4.8e-85	0.000789632
rs2921059	8	8317887	G	T	0.562523	-0.0401012	0.00212431	4.4e-82	0.000791481
rs2921057	8	8318667	C	T	0.539521	-0.0394276	0.00209974	7.7e-82	0.000772412
rs2921042	8	8326470	C	G	0.746327	-0.0236619	0.00239825	2.4e-24	0.000211998
rs35118033	8	8358089	T	C	0.728339	-0.0303695	0.0023557	6.1e-41	0.000364978
rs2980752	8	8358156	C	A	0.68443	-0.03258	0.00224965	2.5e-50	0.000458519
rs2929308	8	9084121	T	A	0.490279	0.0487802	0.00208931	2e-126	0.0011893
rs34597048	8	9219887	C	A	0.90389	-0.0455021	0.00373172	5.2e-37	0.00035973
rs4383974	8	9619348	C	G	0.702353	-0.0182957	0.0022866	2.2e-17	0.000139954
rs766272875	8	9724398	C	CTTT	0.895007	-0.030531	0.00357669	6.5e-18	0.000175186
rs17151318	8	10060683	C	T	0.574593	-0.0179328	0.00211286	1.8e-17	0.000157214
rs2409701	8	10957723	G	C	0.489112	0.0393467	0.00209434	3e-83	0.000773714
rs59828823	8	11085045	C	T	0.901013	0.0225284	0.00352951	1.3e-10	9.05315e-05
rs2736340	8	11343973	C	T	0.745162	-0.0269985	0.00238875	2.6e-29	0.000276837
rs1382568	8	11351220	A	G	0.222416	0.0308596	0.00262272	2.1e-35	0.0003294
rs13332	8	11706581	T	G	0.366214	0.0195604	0.00218394	3.4e-20	0.000177608
rs57534651	8	12034582	G	T	0.609002	-0.0365826	0.00303279	3.4e-34	0.000637342
rs541977430	8	12081808	G	T	0.476415	0.029191	0.00332467	4.2e-19	0.000425109
rs10087422	8	12149239	C	T	0.453947	-0.0399103	0.0029756	3.4e-41	0.00078966
rs137919848	8	12179666	T	C	0.555098	-0.0350525	0.00315329	8.5e-28	0.000606879
rs150510736	8	12293873	C	A	0.66244	-0.0367802	0.00377323	6e-21	0.000605
rs77040936	8	13267571	T	A	0.872	0.0187269	0.00317576	3.6e-10	7.82867e-05
rs749368	8	22501333	A	T	0.938986	-0.0361054	0.00439506	3.7e-17	0.00014937
rs13261573	8	25248615	G	A	0.751337	0.0183915	0.00241058	1.2e-15	0.000126389
rs6471752	8	49309167	C	T	0.846907	0.0248685	0.00290572	4.4e-19	0.000160369
rs72656010	8	57122215	T	C	0.86746	-0.0215022	0.00308898	1.2e-11	0.000106314
rs4737933	8	69895506	G	A	0.441327	0.0147848	0.00216033	2.9e-11	0.00010779
rs11988286	8	70182015	A	T	0.781496	0.0263849	0.00253612	1.7e-27	0.000237754
rs34515576	8	71933788	G	A	0.477584	0.0285866	0.00209429	5.3e-47	0.000407776
rs737534	8	72088171	A	G	0.812033	0.0159735	0.00267083	3.7e-10	7.78907e-05
rs7830123	8	72219699	A	G	0.742723	0.0306453	0.00238888	4.1e-40	0.00035891
rs35988618	8	72460792	G	C	0.714985	0.0156108	0.00231409	8.6e-12	9.93219e-05
rs2581260	8	77493526	T	A	0.836546	-0.0249697	0.00290942	3.1e-18	0.000170507
rs4739697	8	80822461	A	G	0.339701	0.0218287	0.00221662	2.1e-24	0.000213758
8:81444872_AT_A	8	81444872	AT	A	0.772447	0.0173155	0.00254932	5.5e-12	0.000105403
rs35889496	8	89334910	A	G	0.303088	-0.0151252	0.00229888	3.2e-12	9.66449e-05
rs6415571	8	96656533	T	G	0.227411	0.0245018	0.00249932	1.1e-22	0.000210953
rs79121242	8	100697029	T	C	0.942683	0.0290178	0.00451118	3.7e-11	9.0993e-05
rs1667633	8	100789815	C	T	0.955084	0.0305554	0.00503613	7.5e-10	8.0103e-05
rs1389976	8	108890004	T	G	0.890779	0.0261421	0.00340332	7.4e-15	0.00013298
rs73700340	8	108933530	A	T	0.962973	0.0443651	0.00698302	2e-10	0.000140361
rs74974549	8	108991150	A	T	0.532196	-0.0118415	0.00210645	5.5e-09	6.98199e-05
rs7815105	8	109298794	C	T	0.387855	0.0161262	0.00214486	2e-15	0.000123486
rs2721932	8	116620304	G	A	0.44264	0.0128058	0.00210788	5.5e-10	8.09152e-05
rs2737265	8	116667634	A	G	0.718653	-0.0381349	0.00232378	2e-65	0.00058808
rs541092898	8	116855601	G	A	0.995913	0.120479	0.019928	2.4e-10	0.000118162
rs1005502	8	117167843	C	T	0.264393	0.026736	0.00239798	1.7e-31	0.000278047
rs764982	8	119757827	G	A	0.210269	0.0229644	0.00256229	6.5e-22	0.000175144
rs117204589	8	119917642	T	C	0.982138	-0.101216	0.00799006	4.6e-39	0.000359444
rs7813157	8	119923365	G	T	0.0526911	-0.0445777	0.00467613	5.4e-22	0.000198378
rs1586274	8	120026562	A	G	0.515903	0.0121022	0.00209656	1.8e-10	7.31575e-05
rs7841822	8	120506546	G	T	0.568906	0.0115834	0.0021115	4.7e-09	6.58134e-05
rs4871827	8	121061879	G	A	0.673211	-0.0127963	0.00222237	3.8e-10	7.20473e-05
rs6470159	8	124610526	G	A	0.336898	-0.0143019	0.00222939	3.7e-10	9.13895e-05
rs7014448	8	127990833	T	G	0.318596	0.0291246	0.00223873	7.2e-42	0.000368294
rs7017252	8	129950844	C	T	0.616624	-0.0154619	0.0021526	2.8e-14	0.000113032
8:130721742_TGATA_T	8	130721742	TGATA	T	0.804037	-0.0219431	0.00266709	7e-17	0.000151732
rs558657497	8	135578636	C	CAAAAAAAAAAAAA	0.49952	-0.0126142	0.00209599	2.3e-09	7.95589e-05
rs7000279	8	142298179	C	T	0.73441	-0.0148644	0.00237128	8.4e-12	8.61936e-05
rs62530366	8	145536056	A	G	0.61472	-0.01309	0.00215803	8.3e-10	8.11639e-05
rs785836	9	248428	C	T	0.648801	-0.013962	0.0021936	1e-10	8.88362e-05
rs12340775	9	13226945	G	A	0.944484	0.042545	0.00468969	1.7e-19	0.000189819
rs17278798	9	13986133	G	C	0.626955	-0.0127976	0.00215833	2.6e-11	7.66099e-05
rs1927625	9	16439783	A	G	0.924954	0.032157	0.00402571	9.8e-17	0.000143558
rs10756762	9	16563123	T	C	0.589929	-0.0222445	0.00214642	3.3e-24	0.000239405
rs4961733	9	16686327	G	A	0.198406	-0.0290091	0.00262458	3.3e-29	0.000267675
9:16886714_AT_A	9	16886714	AT	A	0.235154	-0.0164305	0.00246904	5.6e-11	9.71087e-05
rs78817479	9	17040371	C	A	0.915871	-0.0274128	0.0037774	1.3e-12	0.000115802
rs11792038	9	18492651	C	T	0.869593	0.0189399	0.00311039	6.3e-10	8.13584e-05
rs35264941	9	18626297	G	C	0.982063	0.0658425	0.00787483	2.1e-17	0.000152733
rs10117672	9	18909703	G	A	0.603398	0.012405	0.00215537	1.6e-10	7.36516e-05
rs4007663	9	18969026	A	AATGAGAC	0.960168	0.0333675	0.00569232	2.6e-09	8.51641e-05
rs7038427	9	27270016	G	C	0.33344	-0.012924	0.0022148	3.5e-09	7.42473e-05
9:33806026_CA_C	9	33806026	CA	C	0.629355	0.0148362	0.00217052	2.9e-12	0.00010269
rs7873822	9	35726821	G	T	0.686701	0.0143036	0.00225438	1.2e-10	8.80334e-05
rs11142400	9	73017959	G	A	0.668267	-0.0136352	0.00222169	4.3e-09	8.24312e-05
rs4535826	9	86556831	A	G	0.779491	0.0149969	0.00254372	4.5e-09	7.73162e-05
rs4878008	9	89334752	C	A	0.618184	0.0161388	0.0021583	8.6e-15	0.000122954
rs13290575	9	89700720	G	A	0.728068	-0.0174596	0.00234862	1.7e-13	0.000120707
rs55659150	9	90971991	A	G	0.881153	0.0194261	0.0033181	5.5e-09	7.90389e-05
rs117360596	9	95640171	C	T	0.970442	-0.0435799	0.00644391	6e-12	0.000108955
rs10761177	9	95644104	A	G	0.634158	0.0182781	0.00218538	1e-17	0.000155018
rs12683791	9	96463094	T	C	0.728983	-0.0280191	0.00235105	2.7e-36	0.000310207
rs4744295	9	96623821	A	G	0.581731	-0.0194331	0.00211769	1.7e-22	0.000183777
rs13291289	9	96720778	C	T	0.602687	-0.0212213	0.00212935	2.9e-27	0.000215674
rs7866254	9	96903469	G	A	0.784631	-0.0229981	0.00255929	2.2e-21	0.000178757
rs61420024	9	98255103	A	AG	0.643333	0.0269329	0.0021846	3.4e-38	0.000332886
rs79423161	9	109469434	C	G	0.924721	-0.0230737	0.00395866	3.3e-09	7.41223e-05
rs1352755	9	109488759	T	C	0.439532	-0.0143759	0.0021036	3.6e-12	0.000101822
rs28729182	9	110746766	A	T	0.890208	-0.0236555	0.00334688	1.9e-13	0.000109385
rs7027772	9	110929605	T	C	0.703176	0.0265344	0.00229292	3.5e-32	0.000293908
9:111125628_ACT_A	9	111125628	ACT	A	0.754486	-0.0209713	0.00243355	5e-20	0.000162933
rs1538658	9	111523941	C	T	0.823431	-0.0184729	0.00273303	3.4e-10	9.92297e-05
rs2846444	9	113570107	G	A	0.413298	-0.0168442	0.00212065	1.4e-17	0.000137598
rs79158536	9	118767409	C	A	0.922904	-0.0388502	0.00391668	1.5e-25	0.000214785
rs10817895	9	119232509	A	T	0.728199	-0.0173765	0.00235386	7.8e-14	0.000119524
rs56200518	9	124535526	C	T	0.989163	0.0598591	0.0100618	7.9e-10	7.68188e-05
rs16911180	9	124738711	T	C	0.822397	-0.0164657	0.00276677	1.8e-09	7.91995e-05
rs78676690	9	126355382	C	T	0.939499	0.0301418	0.00440149	1.4e-13	0.000103283
rs12379417	9	127029736	G	A	0.63373	-0.0136302	0.00216914	5.7e-10	8.62462e-05
rs3829849	9	129390800	C	T	0.631441	-0.0138863	0.00216226	2.4e-11	8.97517e-05
rs72767980	9	130320557	C	T	0.828762	-0.0286656	0.00286794	1.1e-23	0.000233229
rs9657746	9	133481563	C	G	0.650274	0.0306599	0.00220002	1e-49	0.000427559
rs635634	9	136155000	C	T	0.814402	0.0311795	0.00269803	8.4e-34	0.000293887
rs11185677	9	137094359	G	A	0.842991	0.020479	0.00289167	1.4e-12	0.000111018
9:139835802_A_G	9	139835802	A	G	0.995331	-0.0968623	0.0152842	1.6e-10	8.72029e-05
rs488535	10	3629908	C	T	0.294978	-0.0181615	0.00229459	5.6e-15	0.000137191
rs560381515	10	3744022	C	CT	0.756728	0.0215035	0.00249648	6.1e-19	0.000170247
10:3823142_TAAGAG_T	10	3823142	TAAGAG	T	0.616062	0.0157598	0.00215385	1.2e-14	0.000117494
rs78135803	10	5721701	G	A	0.949676	0.0296769	0.00475842	7.6e-10	8.41817e-05
rs192899375	10	17932756	A	C	0.791171	0.0205147	0.00348107	3.2e-11	0.000139066
rs74119759	10	20143109	C	T	0.840646	0.0295501	0.002864	5.2e-27	0.000233951
rs10764201	10	20379378	C	T	0.480995	-0.0203878	0.00208249	1.7e-23	0.000207531
rs3858202	10	21315553	A	C	0.396388	-0.0143502	0.00212314	1.6e-12	9.85427e-05
rs796422700	10	23637845	A	AT	0.546243	-0.0135345	0.00209455	7.8e-11	9.08079e-05
rs10764717	10	27888853	G	C	0.491837	0.028236	0.00207968	9.9e-45	0.00039853
rs577267998	10	28010189	GA	G	0.0745462	-0.0323873	0.00403074	1.3e-17	0.00014473
rs75587692	10	28011228	C	T	0.986201	0.0559712	0.00891492	1.2e-10	8.52653e-05
rs11006832	10	28356797	C	G	0.926142	0.0232101	0.00398626	1.6e-10	7.36986e-05
rs12241932	10	28435915	T	C	0.780507	0.0332937	0.00251948	5.7e-44	0.000379797
rs765093878	10	28518817	C	CAAAAAA	0.881459	-0.0310881	0.00341316	7.9e-22	0.000201971
rs1762188	10	28602643	G	A	0.725726	-0.0156662	0.00233733	6.3e-13	9.77045e-05
10:28670414_TG_T	10	28670414	TG	T	0.994464	-0.115917	0.0160526	8e-14	0.000147948
rs34718559	10	29010418	C	T	0.976264	0.0437217	0.00689187	3.1e-11	8.85929e-05
rs746652558	10	29087203	C	CCA	0.503093	-0.021101	0.00226816	4.8e-21	0.000222618
rs570942	10	29472548	C	T	0.897907	-0.0203771	0.00344937	5.6e-09	7.61276e-05
rs947091	10	31054186	G	A	0.51684	-0.0432843	0.00208841	1.3e-99	0.000935703
rs11238754	10	44367155	C	T	0.556876	-0.0124504	0.00209061	4.5e-11	7.65033e-05
rs1159798	10	54412493	A	C	0.224026	0.0700856	0.00249115	4.1e-182	0.00170778
rs74394067	10	54413404	G	T	0.974676	0.113506	0.00661348	1.1e-68	0.000636005
rs11002936	10	54413909	A	G	0.674698	0.0406005	0.00226612	2.7e-76	0.000723584
rs11002954	10	54418743	G	T	0.871782	0.111629	0.00313325	3.6e-300	0.00278574
rs7070913	10	54420223	G	A	0.892944	0.138494	0.00337177	0	0.00366714
rs56861435	10	54421397	A	C	0.986765	0.1708	0.0104503	9.4e-66	0.00076198
rs138491068	10	54464862	G	A	0.971716	0.0379315	0.00643612	1.4e-09	7.90879e-05
rs764192132	10	54470780	CTG	C	0.45632	-0.0295729	0.0021049	2.6e-48	0.000433941
rs7069916	10	60271824	G	A	0.656398	-0.0202093	0.0021875	2.8e-21	0.000184228
rs1904398	10	62493950	A	C	0.493332	-0.0170171	0.00208589	6.7e-16	0.000144765
rs10740059	10	63809527	G	A	0.586663	-0.0130738	0.00212133	1.9e-10	8.28947e-05
10:70581945_CT_C	10	70581945	CT	C	0.857831	0.0174644	0.00309977	3.2e-09	7.4395e-05
rs68185000	10	72412859	C	CT	0.744006	-0.0145124	0.00239028	1.8e-09	8.02259e-05
rs61578783	10	77620902	G	A	0.841036	0.0183848	0.00284347	1.2e-10	9.03777e-05
rs4745812	10	77856524	T	G	0.508532	-0.012105	0.00208368	7.1e-10	7.32442e-05
rs1907310	10	78299227	G	A	0.168128	0.0210618	0.00277813	1.8e-14	0.000124084
rs10824560	10	79416901	C	T	0.819882	0.0308177	0.00270501	2.7e-32	0.000280504
rs1463598	10	81139134	C	T	0.638027	-0.0152477	0.00216831	2.1e-12	0.000107388
rs7902460	10	82199263	T	A	0.425566	-0.0150737	0.00210195	3.5e-11	0.00011109
rs34192637	10	88688422	C	CT	0.899742	-0.0245356	0.00353359	6.1e-13	0.000108608
rs17173698	10	89468953	G	A	0.974926	-0.0574583	0.00664015	3.9e-16	0.00016141
rs7896505	10	89477109	C	T	0.574921	0.0170634	0.00211549	2.7e-16	0.000142311
rs4989187	10	94958906	G	A	0.530164	0.0157094	0.00208737	7.9e-15	0.000122944
rs72840032	10	101889964	C	T	0.954942	-0.0324844	0.00504323	2.9e-10	9.08089e-05
rs603424	10	102075479	G	A	0.827829	0.0309939	0.00275812	7.4e-31	0.000273831
rs35205878	10	103743133	G	A	0.709072	0.0153603	0.00229262	6.1e-13	9.73431e-05
rs11195154	10	112242950	T	G	0.828208	-0.0220353	0.00275794	1.1e-15	0.000138169
rs4918760	10	114376265	C	A	0.354686	-0.0128811	0.00217788	8e-11	7.59541e-05
rs11196171	10	114724473	A	G	0.786417	0.0307374	0.00257453	4.3e-35	0.000317383
rs10885447	10	115166770	G	A	0.788004	-0.0264048	0.00255546	1.4e-25	0.000232944
rs11599095	10	115191169	G	C	0.813663	-0.0166342	0.00269361	4.3e-09	8.3903e-05
rs6585763	10	123588948	C	G	0.0807269	-0.0312053	0.00381925	4.1e-17	0.000144527
rs7899628	10	123663944	C	T	0.641464	-0.0183728	0.00216759	1e-18	0.000155269
10:123694303_AGTTATAAAC_A	10	123694303	AGTTATAAAC	A	0.913857	0.0316996	0.00370238	2.3e-18	0.000158211
10:124043963_CA_C	10	124043963	CA	C	0.466827	0.0162869	0.00210082	6e-16	0.000132048
rs61872090	10	126484555	G	A	0.378385	-0.011752	0.00214236	4.2e-09	6.49694e-05
rs11244909	10	127944593	T	C	0.390247	-0.01467	0.00212957	5.1e-14	0.00010242
rs12254582	10	131279791	A	G	0.707181	0.0201092	0.00228939	2.5e-20	0.000167475
rs12243075	10	134255426	A	G	0.982677	0.0472037	0.00799234	3.5e-10	7.58605e-05
rs1133400	10	134459388	A	G	0.780055	-0.0289071	0.00250681	1.4e-32	0.000286733
rs2653559	11	8900394	C	T	0.834509	0.0329226	0.00278868	1.5e-34	0.000299381
rs16908520	11	10922033	A	C	0.814032	0.0194693	0.00269714	4e-15	0.000114765
rs17507577	11	15243059	G	A	0.925411	-0.06184	0.00393909	1.4e-59	0.000527933
rs61748861	11	15247307	C	A	0.994281	-0.0796982	0.0137441	3.2e-10	7.22364e-05
rs4456244	11	15439353	T	C	0.558542	0.0199532	0.00209229	3.5e-23	0.000196336
rs11023703	11	15765459	G	C	0.884197	0.0182914	0.00327901	2.9e-09	6.85161e-05
rs11023719	11	15815039	G	C	0.969424	-0.0527988	0.00602623	1.5e-18	0.000165262
rs61171454	11	15850304	G	T	0.978066	0.0626712	0.0071569	1.1e-19	0.00016852
rs11023759	11	15904259	T	C	0.861341	0.023939	0.00299752	8.7e-17	0.000136888
rs722317	11	15923562	G	A	0.53264	0.0121021	0.00211236	2.6e-09	7.29183e-05
rs112629408	11	15975178	A	AAG	0.972945	-0.043929	0.00648171	9.7e-13	0.000101594
rs113150176	11	16216874	T	C	0.962852	-0.039336	0.00547922	2.5e-13	0.000110689
rs766368749	11	16271834	C	CTT	0.20609	0.024744	0.00256335	7.8e-22	0.000200354
rs181977858	11	16376661	C	G	0.997502	0.132455	0.0217719	8.7e-10	8.74325e-05
rs10832618	11	16509357	G	T	0.432873	0.0153708	0.00209579	9.5e-15	0.000116002
11:16672348_GA_G	11	16672348	GA	G	0.288619	0.0293861	0.00229724	1.6e-39	0.000354602
rs34591978	11	16751576	A	AATAT	0.191515	-0.0311261	0.00267499	1.5e-32	0.000300023
rs7123749	11	27303855	A	G	0.365205	0.0503959	0.00215868	1.9e-134	0.00117758
rs6484292	11	27337801	G	A	0.313944	0.0512088	0.00236538	5.8e-115	0.00112962
rs777116077	11	27358374	ACTGTTCT	A	0.633186	-0.0149799	0.00215435	4.2e-12	0.000104238
rs11030023	11	27505351	C	A	0.795765	0.0296032	0.00335829	6.1e-20	0.000284854
rs2352800	11	27507764	T	C	0.803731	-0.0254377	0.00263578	9.9e-23	0.000204149
rs12787251	11	27514206	T	C	0.930592	0.0365187	0.00413123	2.4e-20	0.000172278
rs11031002	11	30215261	T	A	0.867124	0.0207568	0.00306607	2.7e-11	9.92838e-05
rs382603	11	30877924	T	C	0.333482	0.013753	0.00221385	4.3e-12	8.40832e-05
rs158629	11	30962964	C	G	0.329242	0.013512	0.00221368	1e-11	8.064e-05
rs72904932	11	33136067	T	C	0.971226	0.0400648	0.00623859	9.8e-10	8.97174e-05
rs387619	11	35098193	T	C	0.452091	-0.0321997	0.00208297	2.6e-58	0.000513651
rs764166931	11	46720157	CA	C	0.0690074	0.0514035	0.0057111	3.9e-20	0.000339514
rs3885274	11	47119875	A	T	0.321612	0.037657	0.00222749	2.9e-69	0.000618774
rs35518693	11	47124950	C	CA	0.515416	0.0346291	0.00240265	2.9e-52	0.000599017
rs11444403	11	47235732	G	GA	0.0884122	0.0602956	0.00589038	3.1e-27	0.000586019
rs548825905	11	47822231	C	T	0.987443	-0.0927925	0.0132335	3e-14	0.000213527
rs7117516	11	48098496	T	C	0.141562	-0.0215687	0.00300454	1.2e-12	0.000113066
rs4980483	11	50649709	T	C	0.176047	0.020015	0.00272242	2.5e-13	0.000116218
rs12270310	11	51247433	T	G	0.972941	-0.0439406	0.00724288	1.1e-09	0.000101662
rs71470264	11	57057636	C	CTGGA	0.955688	-0.0312403	0.00505056	4.5e-10	8.26605e-05
11:57413657_GTTCT_G	11	57413657	GTTCT	G	0.9828	-0.0656087	0.00837947	3.8e-15	0.000145528
rs34193069	11	58386797	G	A	0.919258	-0.0301191	0.0038193	4.3e-16	0.000134664
rs116918730	11	58920492	C	G	0.954442	0.039913	0.00496652	1.7e-16	0.000138539
rs17154511	11	59825585	A	G	0.709964	-0.0133599	0.00228829	1.4e-09	7.35063e-05
rs666555	11	59970984	G	A	0.599449	-0.0237081	0.00211906	2e-30	0.000269919
rs10792263	11	60079651	C	T	0.373803	-0.0270939	0.0021454	1.6e-38	0.000343658
rs138052480	11	61194524	A	AG	0.18821	0.0174337	0.00277979	5.3e-10	9.28743e-05
rs174529	11	61543961	T	C	0.626223	-0.0191264	0.00214732	4.1e-18	0.000171253
rs117111740	11	62201239	T	C	0.973302	0.119916	0.00655462	1.1e-77	0.000747327
rs11231740	11	64046641	C	T	0.520776	0.0125367	0.00207294	1.5e-09	7.84487e-05
rs1346	11	65337251	A	T	0.800129	-0.0236382	0.00259589	6.3e-23	0.000178718
rs66864335	11	65390803	G	A	0.776209	0.028147	0.00248736	5.6e-33	0.000275243
rs537328386	11	65405533	G	A	0.992675	0.105021	0.0139921	8.6e-15	0.000160397
11:65466496_AG_A	11	65466496	AG	A	0.6588	-0.0256155	0.00218885	2.3e-33	0.000294984
rs5792377	11	65728676	A	AAAAAC	0.779931	0.0136392	0.00253036	1.1e-09	6.38591e-05
rs36027301	11	67809268	C	T	0.941235	-0.0327651	0.00441131	1.5e-12	0.00011876
rs555636223	11	67951782	T	C	0.996432	0.253063	0.01904	4.6e-44	0.000455365
rs61887821	11	68099622	G	A	0.994312	0.221288	0.0139105	5.4e-62	0.000553896
rs167549	11	68127313	G	A	0.927774	-0.0372095	0.00403469	8.8e-19	0.000185555
11:68165114_CCGT_C	11	68165114	CCGT	C	0.332139	-0.0385536	0.0022472	2.2e-72	0.000659426
rs4988321	11	68174189	G	A	0.948384	0.0877002	0.00468452	1.7e-87	0.000753008
rs61582735	11	68183214	C	CAAAT	0.00590027	-0.120282	0.0162577	6e-15	0.00016972
rs762246412	11	68223748	G	GTT	0.835576	0.0514826	0.00294257	5.2e-75	0.000728286
rs58332211	11	68310871	G	GT	0.377009	-0.0318014	0.00221781	2.3e-52	0.000475068
rs2510405	11	68425095	T	G	0.189352	-0.0316015	0.00265425	2.9e-38	0.000306583
11:68546210_AAAG_A	11	68546210	AAAG	A	0.99619	0.180656	0.0204826	1.5e-21	0.000247743
rs549361352	11	68837057	C	G	0.807177	-0.0315298	0.00316957	5.6e-23	0.000309457
rs3829241	11	68855363	G	A	0.597	-0.0304472	0.00211109	8.5e-51	0.000446071
rs3837412	11	72349731	C	CCTG	0.327671	-0.0133928	0.00222222	1.1e-09	7.90301e-05
rs149504726	11	86653988	G	A	0.993312	-0.156756	0.0133007	1.3e-34	0.000326483
rs2445584	11	86791877	T	C	0.549643	0.0184193	0.00207913	2.3e-20	0.000167963
rs764257935	11	86854406	TTC	T	0.775788	0.0664249	0.002642	1.6e-147	0.00153495
rs796783884	11	86854407	TC	T	0.865567	0.082982	0.00320152	8.5e-155	0.00160252
rs67692806	11	86854408	C	T	0.972816	0.114317	0.00852386	4.5e-43	0.000691187
rs553840798	11	86860074	T	TTGTG	0.918811	0.0465315	0.0038909	3.3e-36	0.000323033
rs75506452	11	86870653	A	G	0.937838	0.0666716	0.00516675	2.5e-39	0.00051828
rs664918	11	86870657	A	C	0.874466	0.0789928	0.00329578	3e-133	0.00136996
rs34575204	11	86881368	T	TC	0.686413	0.0733346	0.00223042	6.5e-251	0.00231522
rs12293231	11	86983831	A	G	0.572073	-0.0183634	0.00209634	2.2e-19	0.000165104
rs11019658	11	91584387	A	G	0.881909	0.0182513	0.0032305	2.5e-10	6.93838e-05
rs10765567	11	92601909	A	T	0.626496	0.0205853	0.00214389	3.6e-24	0.000198316
rs7931899	11	101979372	C	T	0.542697	-0.0130362	0.00208031	2.6e-10	8.43516e-05
11:112144043_TC_T	11	112144043	TC	T	0.939583	0.0549316	0.00443946	3.1e-36	0.000342585
rs71060244	11	112194984	C	CT	0.728077	0.0217906	0.00245601	2.8e-20	0.000188015
rs4542449	11	112209416	G	C	0.605614	-0.0180846	0.00212375	2e-19	0.00015623
rs144115184	11	112375092	G	C	0.98253	-0.0847263	0.00966408	1.1e-18	0.000246437
rs11606786	11	112401449	T	C	0.829551	-0.0564529	0.00334564	2.3e-69	0.000901239
rs7121746	11	112437007	A	G	0.413725	0.0640469	0.002116	3.6e-213	0.00198994
rs11214269	11	112474710	G	T	0.561646	-0.0175196	0.00208883	9.3e-19	0.000151135
rs17510563	11	113033220	A	G	0.906116	-0.0326954	0.00356086	4.4e-22	0.000181877
rs143265819	11	113033994	C	T	0.98379	0.111955	0.00834173	4.2e-43	0.000399763
rs1048932	11	115044850	C	A	0.586811	-0.0377003	0.00210512	1.5e-75	0.000689234
rs141892754	11	115080365	G	A	0.997423	0.140788	0.0226973	1.2e-10	0.000101896
rs11215498	11	115202602	G	T	0.875894	-0.0335047	0.0036897	1e-19	0.000244054
rs12271964	11	115475927	C	A	0.780495	0.0274409	0.00252664	1.9e-29	0.000258013
rs2846894	11	115487772	A	G	0.148881	0.0307674	0.00292493	2.1e-26	0.000239906
rs10790087	11	115538354	A	T	0.11849	0.0321618	0.00321805	2.5e-24	0.000216083
rs1784987	11	115546459	C	G	0.11547	0.0324684	0.003257	1.6e-24	0.000215344
rs10790255	11	118515579	G	T	0.246248	-0.0298251	0.00240655	2.2e-31	0.000330214
rs111952858	11	120199714	G	T	0.787427	0.0150086	0.00253537	3.5e-09	7.541e-05
rs67575951	11	121671490	A	C	0.933287	0.0330717	0.00417157	3.7e-15	0.000136197
rs1622638	11	121800971	G	A	0.6054	-0.0142396	0.00212089	3.1e-11	9.6878e-05
rs10892798	11	121923210	C	T	0.351123	-0.0166764	0.00217334	5.3e-14	0.000126723
rs371231344	11	122347596	G	GAGA	0.142	-0.0177934	0.00306866	5.3e-09	7.71478e-05
rs7126747	11	123416936	G	A	0.894254	-0.0212038	0.00336771	1.1e-10	8.5032e-05
rs3808995	11	124955977	C	T	0.375326	0.0142841	0.00214525	8.3e-12	9.56749e-05
rs10893348	11	125065526	C	T	0.564699	-0.0176381	0.00209814	3e-18	0.000152947
rs2849225	11	125415936	A	G	0.118402	-0.0210097	0.00320927	1.4e-11	9.21508e-05
rs34839878	11	128689632	A	T	0.627147	-0.0161546	0.00217141	4.6e-13	0.000122048
rs745680717	12	589872	CCTG	C	0.593534	-0.0275645	0.00213741	8.7e-40	0.000366606
rs372936466	12	973276	G	GTTTTTTTTT	0.920372	0.0253698	0.00443232	4.7e-09	9.43394e-05
rs10848507	12	1629503	A	G	0.878078	0.0282904	0.00318467	1.4e-18	0.000171365
rs35223785	12	1638671	A	G	0.753889	-0.0402332	0.00241797	1.7e-63	0.000600672
rs74057888	12	1638772	G	C	0.927153	0.0633929	0.00401496	2e-62	0.000542843
rs72653424	12	1639708	T	C	0.306015	-0.0160252	0.00228838	7.6e-13	0.000109076
rs7301013	12	2508571	A	G	0.847035	-0.0251011	0.00289347	6.6e-20	0.000163271
rs56196860	12	2908330	C	A	0.968618	-0.0354551	0.00596303	6.2e-09	7.64224e-05
12:3215022_TCA_T	12	3215022	TCA	T	0.585241	0.0159172	0.00212091	8.3e-15	0.000122997
rs76895963	12	4384844	T	G	0.97942	0.0762272	0.0080934	4e-23	0.000234242
rs142989458	12	12277082	C	T	0.982796	0.0605724	0.00860006	8.7e-13	0.000124072
rs10772533	12	12290000	T	A	0.191275	0.0263081	0.00265034	1.1e-22	0.000214125
rs77216612	12	12877983	A	G	0.713549	-0.0139422	0.00230274	3.8e-09	7.94633e-05
rs561024707	12	13228385	T	G	0.994453	-0.207561	0.017124	4.3e-36	0.000475296
rs75432890	12	13327596	C	CATT	0.947103	-0.0375543	0.00474324	1.1e-15	0.000141312
rs117481343	12	13328208	C	T	0.971103	-0.137089	0.00639645	2.8e-110	0.00105476
rs2430689	12	15050737	C	G	0.605914	0.0151133	0.00212791	5e-14	0.000109081
rs201210393	12	21365137	T	A	0.843764	-0.0181739	0.00288772	3e-10	8.7082e-05
rs76504223	12	24198234	A	T	0.911247	0.0223987	0.00368216	2.9e-10	8.11512e-05
12:26229533_CT_C	12	26229533	CT	C	0.608311	-0.0136417	0.00216245	2.4e-10	8.86817e-05
rs7974900	12	26428677	T	C	0.263393	-0.0209777	0.00236256	5.7e-20	0.00017076
rs1872992	12	26457190	A	G	0.756719	-0.0288177	0.002423	2.1e-34	0.000305768
rs3963361	12	28082167	T	C	0.541336	0.0136359	0.00210594	1.4e-09	9.23335e-05
rs1581630	12	28619311	C	A	0.228863	0.0267015	0.00247889	7.4e-30	0.000251657
rs150466852	12	28672227	G	GTTTGTTTTGT	0.707711	0.0139399	0.00229546	2.2e-10	8.03929e-05
rs111702909	12	29098661	A	AT	0.845146	0.0263428	0.00287464	5.1e-23	0.000181639
rs10843391	12	29508642	A	G	0.714781	-0.0162065	0.00230998	9.8e-13	0.000107093
12:48566448_TC_T	12	48566448	TC	T	0.975463	0.0522381	0.00807331	1.7e-10	0.000130628
rs75728872	12	49037052	G	A	0.987026	0.0822906	0.00987676	3.9e-18	0.000173433
rs12829682	12	49319036	A	C	0.0271487	0.0382365	0.00640351	2e-09	7.72292e-05
rs61758378	12	49373410	T	A	0.994489	0.094913	0.014037	1.1e-11	9.87442e-05
rs78150433	12	49379123	G	C	0.974716	-0.039526	0.00662868	2e-10	7.70051e-05
rs118115924	12	49379537	G	T	0.988381	0.21155	0.00969275	2.7e-111	0.0010279
rs10875906	12	49385679	C	T	0.722896	-0.0298419	0.00235584	1.3e-39	0.000356781
rs181908897	12	50120393	C	T	0.994759	0.211882	0.0180131	3.7e-33	0.000468112
rs12305097	12	51315031	T	C	0.572895	0.0150077	0.00210764	1.8e-15	0.000110222
rs11170594	12	53944119	T	A	0.671007	0.0164442	0.00230797	1.8e-13	0.00011939
rs763855108	12	54357756	TG	T	0.261403	-0.0174984	0.00240743	4.1e-14	0.000118235
rs12300425	12	54395082	G	T	0.415497	-0.019004	0.00211129	9.9e-19	0.000175418
12:57085576_AT_A	12	57085576	AT	A	0.708744	-0.0143651	0.00234063	7.5e-12	8.51945e-05
rs75505823	12	57540956	G	T	0.931748	0.0249231	0.00412414	1.9e-10	7.90038e-05
rs17733713	12	63096946	G	A	0.89532	-0.019567	0.00340146	5.3e-10	7.17663e-05
rs2218069	12	65755543	A	G	0.320502	0.0141744	0.00223618	3.5e-09	8.75101e-05
rs4077464	12	65940681	T	C	0.982535	-0.0618333	0.00808117	3.8e-14	0.000131217
rs11175835	12	65995687	G	A	0.287007	0.0250423	0.00230372	2.4e-28	0.000256659
rs10878312	12	66048267	C	G	0.235489	0.0213553	0.00245607	2.5e-18	0.000164209
rs1871674	12	66348134	T	A	0.800416	-0.0258041	0.0026072	9.2e-25	0.00021274
12:66509452_CA_C	12	66509452	CA	C	0.968341	0.0407635	0.00616206	1.4e-11	0.000101882
rs10878984	12	69828534	C	T	0.654977	0.012187	0.0021984	1.9e-09	6.71271e-05
rs4761402	12	78221974	T	C	0.656057	0.0194544	0.00219402	4.5e-20	0.000170802
12:83107094_CA_C	12	83107094	CA	C	0.89373	0.0247785	0.00346923	8.5e-14	0.000116626
rs4842700	12	90351662	A	G	0.204566	-0.0409861	0.00258146	3.2e-63	0.00054669
rs76016857	12	90420680	A	T	0.95171	0.0293516	0.00485409	2e-09	7.91873e-05
rs554620424	12	90487781	G	A	0.307545	0.0392116	0.00244098	7.8e-61	0.000654876
rs10858956	12	90514078	C	G	0.20918	-0.0364237	0.00255754	1.8e-50	0.000438931
rs55849728	12	90533915	C	T	0.598727	-0.0547485	0.00212321	6.7e-157	0.00144027
rs202234992	12	90564744	C	T	0.963104	-0.0810771	0.00775281	6.5e-27	0.000467174
12:92579604_TTCC_T	12	92579604	TTCC	T	0.52459	0.0142979	0.00210705	5e-13	0.000101968
rs34716983	12	92961174	C	CA	0.417632	-0.0140742	0.00216655	1.8e-10	9.63538e-05
rs10777536	12	94120732	G	A	0.488147	-0.0163049	0.00208998	4.8e-13	0.00013285
12:104313717_CA_C	12	104313717	CA	C	0.31543	-0.0143656	0.00226879	6.6e-12	8.91248e-05
rs1165675	12	104320991	G	T	0.725103	0.0130785	0.00236432	5.6e-10	6.81892e-05
rs13378103	12	107337624	T	G	0.553897	0.0131705	0.0021519	6.8e-10	8.57233e-05
rs112073168	12	108985976	G	A	0.971426	0.038077	0.00635216	1.6e-10	8.04889e-05
rs11067228	12	115094260	A	G	0.550642	-0.0171922	0.00208866	3.4e-18	0.00014627
rs17498550	12	116593347	C	T	0.761368	0.0200686	0.00244539	1.2e-15	0.000146348
rs1790086	12	123672518	A	G	0.207161	-0.0202386	0.00257084	2.8e-17	0.00013455
rs1790089	12	123683155	A	G	0.207288	-0.0202879	0.00257046	2.5e-17	0.000135268
rs758436299	12	123748666	AAAAG	A	0.805905	0.0235944	0.0026809	2.1e-20	0.000174159
rs34382598	12	124520815	A	G	0.881403	-0.0253865	0.00321151	2.3e-16	0.000134736
rs1880842	12	131621997	A	G	0.282743	0.0188661	0.00232245	1.6e-17	0.000144365
rs912387	13	22185794	C	G	0.438735	-0.0119943	0.002122	4.8e-09	7.08517e-05
rs9509989	13	22643566	T	G	0.120733	-0.0199538	0.00323423	5.3e-11	8.45333e-05
rs8002850	13	22811940	G	A	0.665697	0.0313306	0.00221469	4.6e-49	0.000436902
rs9316971	13	22980191	T	C	0.29411	-0.0168299	0.00232154	1.6e-12	0.000117609
13:24164003_GA_G	13	24164003	GA	G	0.676854	-0.0179532	0.00223575	6.8e-18	0.000140996
rs7329483	13	24242801	A	G	0.118679	0.0241063	0.00325054	4.1e-15	0.000121562
rs75439322	13	24828850	G	A	0.910249	-0.0383681	0.00365922	6.5e-27	0.00024053
rs9580924	13	24871092	G	A	0.89996	0.0236556	0.00348178	3e-13	0.000100762
rs56038439	13	31866836	C	CT	0.250541	0.0138529	0.00245092	4.5e-09	7.20673e-05
rs9652258	13	37476123	G	C	0.761014	-0.0189177	0.00245487	9.7e-16	0.000130176
rs17061453	13	41184358	A	T	0.958881	-0.0426284	0.00527623	4e-15	0.000143296
rs59477460	13	42052411	C	CTGATGGGTCTTGACTCCTTAT	0.322467	0.0170808	0.00225571	7.1e-14	0.000127486
rs9594738	13	42952145	C	T	0.512755	0.0519436	0.00209069	6.6e-145	0.00134819
rs11840862	13	42956463	A	G	0.293846	0.0513546	0.00229402	6.1e-118	0.00109448
rs117543324	13	43153869	A	T	0.968621	-0.0570335	0.00614772	2.5e-21	0.000197735
rs346592	13	43167513	A	G	0.825907	0.0175208	0.00276028	1.9e-11	8.82776e-05
rs11618401	13	43555803	T	C	0.512323	-0.014084	0.00209706	4.3e-11	9.91193e-05
rs11411390	13	44846009	A	AT	0.906472	-0.0277241	0.00359268	1.5e-17	0.000130329
rs5803487	13	50518052	A	AT	0.274067	-0.0188832	0.0023915	1.2e-14	0.000141884
rs3118906	13	51106788	G	A	0.721985	-0.0272393	0.00233064	7.4e-33	0.000297864
rs1239705	13	51152422	A	G	0.461746	0.0183924	0.00210204	1.4e-19	0.00016815
rs2296028	13	52345637	G	C	0.825974	0.0186437	0.00276494	3.7e-11	9.99251e-05
rs773210894	13	74686341	C	CTG	0.282778	-0.021103	0.00235768	6.2e-20	0.000180642
rs141012826	13	93978697	A	ACACACG	0.875704	0.022939	0.00324532	1.5e-12	0.00011455
rs34375635	13	94015805	G	A	0.932977	-0.0336496	0.00424605	2.6e-18	0.000141607
rs72640504	13	94066952	T	C	0.989225	0.111914	0.0105012	4e-28	0.000267
rs147720516	13	94380457	T	TTTTG	0.0545969	-0.0462565	0.00465554	6.4e-25	0.000220882
rs4771320	13	99559135	C	T	0.221655	0.0385993	0.00251568	9.9e-58	0.000514089
rs7998317	13	99586238	C	T	0.300799	0.0378023	0.00227802	2.3e-66	0.000601097
rs61361629	13	100265404	T	C	0.900712	-0.0204093	0.0034989	1e-09	7.45022e-05
rs892254	13	100608335	G	C	0.198769	0.0232164	0.00261589	2.1e-20	0.000171683
rs1966662	13	110454702	G	T	0.668982	0.0229865	0.00222524	7.7e-27	0.000234014
rs1042704	14	23312594	G	A	0.785673	0.0289553	0.00255148	5.6e-30	0.000282361
14:24835773_GA_G	14	24835773	GA	G	0.295959	-0.016487	0.00230258	1.5e-12	0.000113277
rs7155348	14	35216854	T	C	0.634021	-0.0184732	0.00218519	1.4e-16	0.00015837
rs13379337	14	35224430	C	A	0.511658	-0.0243281	0.00210103	2.8e-30	0.000295767
rs56996825	14	35312132	G	T	0.400793	-0.019994	0.0021453	2.3e-19	0.000192011
rs35265117	14	35334328	C	T	0.802601	0.0192806	0.00263324	2.1e-13	0.000117792
rs201894973	14	35338097	AGTAT	A	0.512622	-0.0200985	0.00210302	2.1e-20	0.000201846
rs201613983	14	35359723	CT	C	0.489535	0.0214745	0.00214155	1.6e-22	0.000230476
rs113321876	14	35362139	G	A	0.626896	-0.0193747	0.00217463	1.8e-18	0.0001756
rs8004237	14	35420372	C	G	0.507797	-0.0205943	0.00209238	1.7e-21	0.000212011
rs12323717	14	51154362	A	G	0.637527	-0.0165738	0.002193	1.7e-14	0.000126955
rs1570255	14	53151145	G	C	0.898665	0.0210601	0.0034927	1.4e-10	8.07808e-05
rs71422098	14	53154909	A	G	0.892138	0.021212	0.00340131	1.4e-10	8.65952e-05
rs7143361	14	53773525	G	A	0.674734	0.0195628	0.00223053	1.3e-19	0.000167982
rs210374	14	54155963	A	T	0.266769	-0.0144396	0.00236796	1.6e-10	8.15674e-05
rs35107139	14	54419106	A	C	0.595791	-0.0635749	0.00220355	9.3e-196	0.00194671
rs10130587	14	54419110	G	C	0.595496	-0.0634308	0.00222431	7.3e-194	0.00193835
rs7153662	14	54435049	A	G	0.484893	0.0476138	0.00221116	1.7e-110	0.0011325
rs56312905	14	54437832	G	T	0.16684	0.0371617	0.00286849	1.9e-41	0.000383928
rs531709987	14	54444084	C	CTT	0.879041	0.0265529	0.00337342	3.2e-17	0.000149934
14:54454664_CT_C	14	54454664	CT	C	0.840341	0.0158809	0.00287207	1.9e-09	6.76751e-05
rs61984763	14	54489089	T	C	0.789724	0.0167886	0.0025758	2.6e-12	9.36104e-05
rs796953522	14	54866964	C	CT	0.565413	0.0137551	0.00221043	2.1e-10	9.29822e-05
rs28711886	14	61072658	G	A	0.321449	0.0205435	0.00226331	1.2e-19	0.000184108
rs8014133	14	61104738	A	G	0.0982625	0.0279732	0.00351824	3.1e-16	0.00013867
rs150138734	14	61561844	T	C	0.939104	0.0341483	0.00506385	3.2e-11	0.000133374
14:63665571_TA_T	14	63665571	TA	T	0.535216	-0.0189005	0.00210504	4.8e-20	0.000177728
14:65042372_GT_G	14	65042372	GT	G	0.675131	-0.0142245	0.00228325	1e-10	8.87565e-05
rs2767365	14	68607023	G	C	0.162118	-0.0164242	0.00284285	3.8e-10	7.32846e-05
rs6573817	14	68617269	G	A	0.169416	-0.021074	0.00279435	2.9e-15	0.000124986
rs1958113	14	68637906	A	T	0.160295	-0.019044	0.0028584	1.8e-12	9.76322e-05
rs35230100	14	70348141	C	CATAT	0.567741	-0.0137	0.00218421	1.1e-10	9.21224e-05
rs572568967	14	75529362	CAAA	C	0.522982	0.0183733	0.00209235	8.4e-19	0.000168432
rs876403	14	75602834	A	T	0.523712	-0.0158684	0.00209074	3.6e-15	0.00012562
rs75663481	14	75787011	A	G	0.711305	-0.0224875	0.00238133	6.8e-22	0.000207686
rs72703614	14	89860386	G	A	0.783803	-0.0158282	0.00254476	1.5e-11	8.49082e-05
rs1286075	14	91446796	C	T	0.826725	-0.0326471	0.0027682	2.6e-36	0.000305363
rs765754428	14	91450153	C	CTG	0.878858	-0.0402437	0.00358357	9.9e-32	0.000344857
rs1133441	14	92435065	T	A	0.667435	-0.0132498	0.00222154	1.4e-09	7.79353e-05
rs1953535	14	95596279	G	A	0.911829	0.0265895	0.00368971	5.3e-14	0.000113681
rs62007686	14	103899344	A	G	0.655215	0.0436142	0.00220153	2.1e-91	0.000859445
rs75837874	14	103975472	G	T	0.872055	0.0385635	0.00313335	3.2e-34	0.000331856
rs7140558	14	104018651	A	G	0.713487	-0.0186528	0.00232671	2.7e-16	0.000142249
rs861528	14	104182998	C	T	0.748588	0.0190658	0.00241417	4.7e-17	0.000136826
rs55633823	14	105954705	C	T	0.748526	-0.0172207	0.00242398	3.4e-14	0.000111643
rs7170637	15	22969232	G	A	0.839709	0.0172789	0.00284687	1.5e-09	8.03711e-05
rs74710884	15	30086023	T	C	0.936457	0.0255473	0.00428665	6e-10	7.7674e-05
rs61998565	15	47665185	G	A	0.85596	0.0180872	0.00297962	4.7e-10	8.06695e-05
rs3759809	15	51487352	T	G	0.72578	0.020846	0.00235689	8.8e-19	0.000172974
rs2899472	15	51516055	C	A	0.744368	-0.0387427	0.00239611	2.3e-60	0.000571232
rs2414098	15	51537806	T	C	0.386574	-0.0380203	0.00215944	1.8e-75	0.000685576
rs7168331	15	51620983	G	C	0.61539	-0.0167653	0.00215557	4.8e-16	0.000133053
rs72732986	15	52382477	T	G	0.922163	-0.0247911	0.0038947	7.9e-11	8.82298e-05
rs56259139	15	62747770	C	T	0.90631	0.0229977	0.00360607	1.2e-10	8.98191e-05
rs17184382	15	63792486	A	C	0.573908	0.0192413	0.00211383	5.7e-22	0.000181069
rs542221686	15	63952531	A	ATAAT	0.895086	-0.0280907	0.00359792	3.6e-16	0.000148202
15:65776993_C_CA	15	65776993	C	CA	0.75332	0.0260669	0.00250032	3.4e-29	0.000252535
rs191927852	15	65785697	G	T	0.98091	0.0570834	0.00773747	3.5e-14	0.000122035
rs72741014	15	67151257	T	C	0.80347	-0.0177939	0.00264369	2.3e-11	9.99933e-05
rs10438354	15	67336207	C	G	0.64906	-0.0153085	0.00223612	3.1e-12	0.000106761
rs34728056	15	67432460	C	CA	0.53468	-0.0274379	0.00212963	7.1e-42	0.000374608
rs538356182	15	70403465	T	TA	0.711307	0.0183533	0.00236536	1.5e-14	0.000138341
rs12592259	15	70546411	T	C	0.887736	-0.0259961	0.00334421	6.9e-15	0.000134701
rs1706708	15	70552313	G	A	0.672692	0.0307679	0.00223602	3.3e-49	0.000416868
rs34003015	15	70620476	C	T	0.962896	0.0371313	0.00554597	4.9e-12	9.85168e-05
rs34149821	15	70644280	G	GAC	0.497299	0.0178322	0.00213022	5.6e-17	0.000158989
rs12441130	15	74234902	T	C	0.515173	0.0126142	0.00209096	1.2e-09	7.94858e-05
rs11072526	15	75432517	T	C	0.256989	-0.014357	0.0023955	6.2e-11	7.87168e-05
rs12593629	15	77853736	A	G	0.315963	-0.0139517	0.00226309	2.3e-10	8.41395e-05
rs6496586	15	85540767	G	A	0.81779	-0.0196378	0.00272784	5e-12	0.000114929
rs7167692	15	85660184	T	C	0.947576	0.0537914	0.00469724	1.2e-32	0.000287475
rs11632673	15	91070544	A	G	0.450522	-0.0244013	0.00210755	1.2e-35	0.000294796
rs4299103	15	93588264	G	C	0.559301	0.0160674	0.0022372	2.7e-12	0.000127265
rs7181724	15	94551607	A	G	0.56842	0.0147251	0.00213647	1.9e-13	0.000106384
rs16976004	15	96582997	C	G	0.810231	-0.016086	0.00272511	1.6e-09	7.9572e-05
rs117208012	16	347063	C	T	0.978971	0.0951165	0.0072697	2e-41	0.000372503
rs2301522	16	359953	A	G	0.336589	0.0277694	0.00221226	8.2e-41	0.000344386
rs71378512	16	410178	G	A	0.952861	0.0988047	0.00545443	4.6e-77	0.000876991
rs4988483	16	1129010	C	A	0.942877	-0.0389041	0.00460207	1.5e-17	0.000163037
rs34435227	16	1533220	A	G	0.560118	0.0133394	0.00211594	6.9e-13	8.76836e-05
rs34123233	16	2144299	T	G	0.819729	-0.0257364	0.00272411	1.7e-22	0.000195759
rs77256800	16	3959911	T	C	0.932427	0.0260106	0.00428593	4.9e-12	8.52548e-05
rs710893	16	4014964	A	G	0.154523	-0.0247942	0.00288503	2.7e-19	0.000160629
16:4358400_AT_A	16	4358400	AT	A	0.694182	0.014073	0.00228997	1.4e-11	8.40891e-05
rs8052826	16	4425528	A	G	0.211316	0.0184003	0.0025675	4.6e-12	0.000112854
rs148092711	16	4431767	C	T	0.99479	0.0950537	0.0144863	6.6e-11	9.36563e-05
rs4786488	16	4442527	C	T	0.274645	0.0143967	0.00234304	3.6e-09	8.25806e-05
rs780432508	16	11635315	A	ATT	0.694947	0.0209872	0.00230577	5.8e-21	0.000186752
rs71406254	16	11642910	T	TA	0.657534	0.0229306	0.00221757	5.1e-25	0.000236808
16:12086263_CTCTA_C	16	12086263	CTCTA	C	0.43562	-0.0155833	0.00213581	1.4e-13	0.000119407
rs71382581	16	18928466	T	C	0.911842	-0.023129	0.00372409	1.3e-10	8.60053e-05
rs4783443	16	22226993	C	A	0.918486	-0.0275361	0.00381237	1.2e-13	0.000113538
rs5735	16	23200848	T	C	0.691133	0.0181528	0.00226691	4.6e-15	0.000140686
rs71383766	16	30930233	C	T	0.572314	-0.0178881	0.00217435	2.4e-17	0.000156645
rs933561	16	49874676	A	G	0.653192	0.0163967	0.00219461	2.2e-14	0.000121807
rs59302410	16	50705254	C	T	0.988072	-0.0906632	0.0100497	1.8e-19	0.000193753
rs1564981	16	50986308	G	A	0.546165	0.018635	0.00209878	1.1e-20	0.000172151
rs140144628	16	51025426	G	C	0.990453	-0.091283	0.0114439	2.6e-15	0.000157583
rs62028332	16	51025468	G	A	0.852957	-0.0485004	0.0031081	5.4e-62	0.000590055
rs4785495	16	51066965	C	T	0.51223	0.0157711	0.00211267	4.5e-15	0.000124289
rs149685227	16	51186224	G	A	0.976599	0.0578285	0.00728432	4.1e-15	0.00015285
rs2052285	16	51188432	G	A	0.391512	0.0249968	0.00213753	2.9e-34	0.000297712
rs2052354	16	51423945	A	G	0.261774	-0.0216327	0.00238296	3e-21	0.00018087
rs2647978	16	51624129	C	A	0.707552	0.0157973	0.00229139	2.2e-13	0.000103277
rs35392886	16	51733063	C	G	0.374584	0.0197534	0.00215073	2.7e-22	0.000182823
rs7191269	16	51784918	A	G	0.596959	0.0337215	0.00212521	9.4e-62	0.000547189
rs9935845	16	51847798	G	A	0.466791	-0.0313869	0.00213946	3.3e-54	0.000490396
rs72805220	16	51903981	C	A	0.932224	0.0667623	0.0042119	3.3e-60	0.000563234
16:51906257_CA_C	16	51906257	CA	C	0.498522	-0.0264705	0.00217486	3.1e-37	0.000350341
rs57292959	16	53799279	G	T	0.578185	-0.0147039	0.00211822	9.3e-13	0.000105459
rs12600060	16	54101461	G	T	0.752858	0.0198229	0.00249538	8.1e-14	0.000146226
rs12933070	16	54975735	T	G	0.223603	-0.0193353	0.00252129	9e-16	0.000129806
rs12149673	16	55059130	A	G	0.6959	-0.0288559	0.00227709	4.5e-37	0.000352422
rs12918462	16	55127191	T	C	0.933453	-0.0385501	0.00420052	8.6e-21	0.00018463
rs774904233	16	55510925	GGA	G	0.745537	-0.023388	0.0023951	6.6e-23	0.000207544
rs71649607	16	67005609	C	T	0.84039	-0.0226547	0.00285004	1e-16	0.000137685
rs114934911	16	67310543	C	T	0.96995	0.0772166	0.00610555	1.5e-40	0.000347572
rs567068501	16	67572130	C	T	0.992762	0.153015	0.0135496	9.8e-32	0.000336482
rs557350916	16	68950654	A	AG	0.994367	0.143541	0.017252	9.1e-18	0.000230817
rs74615093	16	69122043	G	A	0.919442	-0.0246351	0.00384115	5.7e-11	8.99025e-05
rs11643240	16	69635916	A	G	0.732191	0.016673	0.00235669	1.8e-13	0.00010902
rs7197197	16	72911406	G	A	0.416482	-0.0139025	0.00212724	1.6e-11	9.39434e-05
rs374035142	16	73917298	ATGTG	A	0.423361	0.0138308	0.00213003	1.4e-11	9.33984e-05
rs2716579	16	74087814	C	T	0.64396	0.0263894	0.00253865	2.5e-27	0.000319335
rs776777733	16	80839588	ATC	A	0.929402	0.0339955	0.00408168	1.1e-16	0.000151659
rs7186061	16	80934495	A	C	0.150889	-0.0172731	0.00291251	4.6e-10	7.64527e-05
rs12932885	16	81579923	C	T	0.500673	0.0252506	0.00209064	4.3e-37	0.000318796
rs8044524	16	81603771	G	A	0.397232	0.0203394	0.0021345	2.6e-26	0.000198107
rs4889341	16	81604251	T	C	0.405201	0.0211398	0.00212521	9.2e-27	0.000215413
rs8045614	16	81609298	A	G	0.350204	0.0191097	0.0021925	9.8e-23	0.000166202
rs4889345	16	81613122	T	G	0.321934	0.019645	0.00227788	7.8e-21	0.00016849
16:81613324_TAAAA_T	16	81613324	TAAAA	T	0.46405	0.0240226	0.00210744	2.6e-34	0.000287051
rs10514617	16	86686972	T	C	0.838178	0.0284551	0.0028528	2.8e-26	0.000219646
rs4843418	16	86689335	G	C	0.715444	0.0173319	0.00233092	3.7e-15	0.000122311
rs299938	16	86694417	A	G	0.766191	-0.0199662	0.00246869	1.7e-17	0.00014283
rs899245	16	86699767	T	A	0.78308	-0.0224029	0.00253309	3.8e-21	0.000170508
rs12918331	16	86700865	T	G	0.740702	-0.0194216	0.00238173	2.4e-19	0.000144891
rs7203324	16	86701426	C	T	0.787071	-0.0224682	0.00256523	4e-21	0.000169206
rs28594464	16	86704864	C	T	0.810947	0.0256878	0.00268225	6.5e-26	0.00020233
rs416675	16	86705100	T	C	0.784795	0.0257787	0.00256076	1.8e-26	0.000224471
rs148672458	16	86708071	C	CTCCTTCCTTCCT	0.847347	0.0390103	0.00299842	1.5e-43	0.000393691
rs388466	16	86708741	G	A	0.681084	0.0284249	0.00225137	1.1e-41	0.000350998
rs68110026	16	86718579	G	C	0.914496	0.0229677	0.00374085	2e-09	8.24961e-05
rs4081747	16	87100746	G	T	0.377591	0.0157667	0.0021692	3.3e-12	0.000116845
rs112898929	16	88298795	T	A	0.920325	0.0256215	0.00391642	2.5e-12	9.62725e-05
rs4782351	16	88466424	A	G	0.387834	0.0156034	0.00214376	5.7e-13	0.000115607
rs11643303	16	88834014	A	C	0.883145	-0.0238566	0.00331258	1.1e-12	0.00011747
rs2272443	16	88854008	C	T	0.771638	0.0224558	0.00250338	2.7e-21	0.000177715
rs57696383	16	89572665	A	G	0.52229	0.0119153	0.00209027	1.3e-09	7.08461e-05
rs56336971	17	738952	T	C	0.689897	0.0192312	0.00225234	1.1e-18	0.000158246
rs72812052	17	838690	G	A	0.761485	0.0163272	0.00244804	4.5e-11	9.68346e-05
rs2376600	17	928078	G	A	0.689341	0.032655	0.00225616	4e-51	0.000456717
rs760060673	17	931496	A	ATTT	0.851423	0.0251023	0.0032201	3.1e-17	0.000159424
17:2026417_GA_G	17	2026417	GA	G	0.316078	-0.0552883	0.00224564	7.3e-145	0.00132159
rs557139647	17	2045819	T	TTCTA	0.979721	-0.068774	0.00749856	2.8e-21	0.000187944
rs216181	17	2172753	A	T	0.945326	0.0601311	0.00580884	1.3e-25	0.000373758
rs9898390	17	2177484	C	G	0.278035	-0.0471822	0.00232203	3.5e-98	0.000893721
rs752131371	17	3985122	CAT	C	0.817036	-0.0156946	0.00269521	1e-09	7.3644e-05
rs34914463	17	7366619	T	C	0.86906	0.0214621	0.00308505	1.2e-12	0.000104833
rs6258	17	7534678	C	T	0.992999	-0.102892	0.0127026	1.4e-16	0.000147198
rs151268686	17	7780690	A	ATT	0.925879	0.048145	0.00402691	4e-34	0.000318147
rs57414300	17	7781699	T	TA	0.816149	0.0230866	0.00272353	2.1e-17	0.00015995
rs12938040	17	9032274	G	A	0.960011	-0.0366498	0.00532951	9.3e-13	0.000103131
rs56235417	17	9142846	G	C	0.836824	0.0327306	0.00282154	5.4e-33	0.000292569
rs9914258	17	10031642	C	T	0.558084	-0.0148971	0.00209647	1.1e-13	0.000109464
rs515385	17	14401108	A	G	0.30859	0.0130087	0.00225518	5.4e-10	7.2213e-05
rs10459910	17	17136891	C	T	0.424675	0.014391	0.00210796	5e-12	0.0001012
rs7222984	17	20019694	A	C	0.389362	-0.0145773	0.00224304	9e-11	0.000101047
rs704	17	26694861	G	A	0.524607	0.0167692	0.00208243	3.9e-16	0.000140262
rs7222696	17	27697619	G	A	0.659572	0.0156731	0.00219867	2.7e-14	0.000110313
rs3760456	17	27948844	C	T	0.559939	0.0268571	0.00210039	3e-40	0.000355469
rs151317021	17	28064938	C	CTTATTTAT	0.532927	0.0210285	0.00211558	1.1e-24	0.00022014
rs8080078	17	28195773	C	T	0.490295	-0.0219377	0.00208354	1e-26	0.000240541
17:29250282_CT_C	17	29250282	CT	C	0.631868	-0.017227	0.00235063	9.6e-14	0.000138064
rs11422116	17	29819884	A	AC	0.358231	0.0238879	0.00219331	2.8e-28	0.000262378
rs112797972	17	29886356	C	G	0.776189	0.0238489	0.00250723	2.1e-22	0.000197613
rs12951408	17	36913807	T	C	0.44108	0.0123018	0.00210562	1.5e-09	7.46164e-05
rs143043662	17	39913771	C	T	0.987622	-0.0780376	0.00989085	1.8e-16	0.000148895
rs7213095	17	39940768	G	T	0.503363	-0.0125896	0.0022514	4.5e-10	7.92454e-05
rs11443474	17	40395191	C	CT	0.709127	-0.014648	0.00233872	3.8e-11	8.85144e-05
rs9904639	17	41437020	G	C	0.844325	-0.021932	0.00322144	2e-12	0.000126449
rs7217502	17	41801246	A	C	0.616189	-0.0427433	0.00216823	1.6e-96	0.000864167
rs35590725	17	41818953	T	G	0.426891	-0.0290741	0.00210988	4.1e-45	0.000413615
rs2741856	17	41826839	G	C	0.918397	-0.0794023	0.00380357	1.7e-104	0.000945002
rs573683582	17	42162884	G	GT	0.983813	0.0700126	0.0100939	1.1e-12	0.000156121
rs190144	17	42164584	A	G	0.256006	0.0396692	0.00238823	2.8e-66	0.000599455
rs4436817	17	43091723	C	A	0.508913	-0.0185535	0.00209584	2.6e-20	0.000172061
rs111443054	17	43489161	T	TCACACA	0.816288	0.0275831	0.00270123	6.4e-26	0.00022819
rs375822897	17	43557054	A	AAAAACAAAAC	0.827761	0.0278212	0.00281069	2.2e-24	0.000220708
rs201647884	17	43666848	A	AAGAAG	0.942001	0.0439701	0.00570179	2.9e-14	0.00021126
rs3843738	17	43739194	A	G	0.52983	-0.0195325	0.00211866	2.3e-20	0.00019008
rs10491140	17	43950976	G	T	0.77482	0.0257143	0.00249233	2.6e-26	0.000230733
rs776509440	17	44173502	A	ATTC	0.835872	0.0286931	0.0030898	2.9e-21	0.000225895
rs2109984	17	46171099	T	G	0.203441	-0.0164339	0.00258601	1.3e-10	8.75322e-05
rs140089442	17	46192972	A	AT	0.892103	0.0256238	0.00336114	3.5e-15	0.000126398
rs78832434	17	48214490	C	G	0.962828	-0.0460458	0.00553727	1.6e-16	0.000151766
rs773541730	17	48256759	CT	C	0.727906	0.0170716	0.00249237	5e-12	0.000115444
rs1061237	17	48262775	A	T	0.971939	-0.0513019	0.00644343	1.8e-17	0.000143562
rs2696264	17	48333349	G	A	0.773091	-0.0336823	0.00247917	5.4e-44	0.00039803
rs6504675	17	48634357	T	C	0.61752	0.0130334	0.0021494	1.3e-09	8.02426e-05
rs4427849	17	49198457	A	G	0.447488	-0.0153981	0.00210264	1.5e-13	0.000117243
rs1367693	17	54187685	T	G	0.463927	-0.0247068	0.00208848	1.8e-31	0.000303624
17:54263286_GA_G	17	54263286	GA	G	0.598021	-0.030069	0.0021256	2.1e-43	0.000434698
rs6505057	17	54499579	G	A	0.692307	0.0141682	0.00226429	2.7e-10	8.55216e-05
rs545164273	17	58655357	C	CTT	0.983825	-0.0955539	0.00996053	1.1e-22	0.000290596
rs573536922	17	58755167	G	A	0.994669	-0.183094	0.0194711	6.2e-23	0.000355521
rs7210311	17	58863915	T	C	0.989906	-0.10812	0.0151969	2e-14	0.000233614
rs538508139	17	58906854	C	CAA	0.863795	-0.0597101	0.00309219	2.5e-87	0.000838937
17:58924550_TATTTTGTATACA_T	17	58924550	TATTTTGTATACA	T	0.970492	-0.100484	0.00794776	2.8e-36	0.000578303
rs142016905	17	59019432	T	TAGG	0.849654	-0.057787	0.00293326	1.6e-91	0.000853148
rs77897572	17	59160227	G	A	0.988824	0.0650765	0.0101231	6.4e-11	9.36017e-05
rs1012383	17	59196065	G	T	0.174911	0.0463513	0.00274163	1.4e-67	0.000620114
rs8070692	17	59288406	T	G	0.834052	-0.0377066	0.00286487	4.2e-43	0.000393577
rs35686232	17	59508427	A	G	0.802671	-0.0179895	0.0026296	1e-10	0.000102517
rs571287458	17	59558059	G	GTTGT	0.896426	0.0220069	0.0034313	9.3e-13	8.99317e-05
rs1558275	17	59636757	T	G	0.371453	-0.0128225	0.00217455	6.2e-09	7.67745e-05
17:60580413_CT_C	17	60580413	CT	C	0.490477	-0.0196455	0.00214284	1.7e-21	0.000192903
rs11079480	17	60592751	A	G	0.409095	-0.012503	0.00211851	1.9e-09	7.55789e-05
rs17650301	17	62479273	A	C	0.706355	0.0183738	0.002283	2.4e-17	0.000140047
rs9896306	17	63278038	C	A	0.727045	0.0283541	0.0023431	3.1e-35	0.000319091
rs11869530	17	63549979	G	A	0.363793	-0.0269089	0.0021652	7.3e-40	0.000335177
rs11077711	17	66691183	C	T	0.766192	0.0170911	0.00247342	1.3e-12	0.000104657
rs180067	17	67957774	G	C	0.319757	-0.013003	0.00222949	1.5e-09	7.35531e-05
rs56320441	17	69206119	T	C	0.912677	-0.0279397	0.00370006	6.2e-15	0.000124428
17:69875248_CA_C	17	69875248	CA	C	0.507541	0.0242359	0.00210843	1.1e-31	0.000293623
rs2292852	17	75095242	G	A	0.617857	0.0143346	0.00214144	1.8e-11	9.7032e-05
rs1436138	17	75316880	A	G	0.639574	0.0196665	0.00217639	4.5e-22	0.000178316
rs34587622	17	75398498	C	T	0.887937	0.0200296	0.00329995	7.7e-10	7.98397e-05
rs10642898	17	76393675	C	CCCG	0.598886	0.0171382	0.00214947	2.6e-16	0.000141115
rs8080307	17	76858353	G	A	0.928944	-0.0266361	0.00405194	2.1e-11	9.36616e-05
rs35881190	17	76906367	C	T	0.651849	0.0167184	0.00220578	9.3e-16	0.000126863
rs7212578	17	79394536	A	G	0.218699	-0.021686	0.0025303	3.6e-19	0.000160714
rs12945403	17	80004094	T	C	0.342704	0.0171079	0.00220826	7.9e-15	0.000131857
rs3751908	17	80529972	A	G	0.364674	-0.0204081	0.00216068	5.9e-21	0.000192991
rs4148965	18	9109484	T	G	0.306427	-0.013638	0.00227141	2.2e-10	7.90589e-05
rs644778	18	10042023	T	C	0.674635	0.0170697	0.00223331	2.6e-14	0.000127915
rs11875132	18	10348334	T	C	0.56286	0.0206752	0.00212346	4.3e-23	0.000210354
rs565611618	18	13642927	G	GT	0.856749	0.0271796	0.00311546	4.4e-20	0.000181329
rs1296042	18	13711002	T	C	0.0865029	0.0473203	0.00372124	5.6e-40	0.000353886
rs4635400	18	13719510	G	A	0.640457	0.0526902	0.00218128	2.8e-140	0.00127859
rs4369779	18	20735408	T	C	0.211409	0.0206034	0.00256388	2.9e-17	0.000141541
rs61735998	18	34289285	G	T	0.974685	-0.0441542	0.00667928	4.3e-11	9.62091e-05
rs12964248	18	42143586	A	T	0.722793	-0.0146535	0.00234005	1e-09	8.6046e-05
rs11659248	18	42907550	C	T	0.843852	0.0163367	0.00290543	2e-09	7.03334e-05
rs7504492	18	45606093	T	C	0.623909	-0.014698	0.0021668	1.4e-12	0.000101382
rs2337106	18	46460903	C	G	0.48255	-0.0187273	0.00210775	3.6e-20	0.000175142
rs12967019	18	46474178	T	C	0.508029	-0.0176753	0.00212206	3.9e-18	0.000156168
rs9952111	18	53453113	G	A	0.837867	0.0177668	0.00284275	2.9e-11	8.5762e-05
rs72966926	18	57328396	G	A	0.870142	-0.0198601	0.00311648	4.3e-11	8.91357e-05
rs35693910	18	57913965	G	A	0.731768	-0.0140548	0.00239708	6.4e-09	7.75467e-05
rs884205	18	60054857	A	C	0.252704	-0.0261596	0.00242543	8.4e-30	0.000258462
rs17756073	18	60809783	A	G	0.697161	0.0145281	0.00228087	1.4e-11	8.91236e-05
rs779566246	18	60950714	TTTAG	T	0.322835	-0.0200565	0.00231856	1.1e-19	0.00017588
rs56376587	18	77160235	A	C	0.51103	0.0148506	0.00212879	9.3e-14	0.000110216
rs78015143	18	77248691	G	A	0.901711	-0.0285075	0.00352602	3.4e-17	0.000144052
rs768306493	18	77353224	CAT	C	0.495064	0.0143547	0.00215476	4.7e-12	0.000103019
rs180712105	19	810412	T	A	0.987349	-0.0667464	0.0106069	7.2e-11	0.000111296
rs72982156	19	816540	T	C	0.61169	0.0244735	0.0021746	6.2e-30	0.000284533
rs116904359	19	957700	C	A	0.95251	-0.034374	0.00525366	1.7e-10	0.000106896
rs150434627	19	1166040	C	CA	0.866903	0.0427938	0.00377032	3.4e-34	0.000422601
rs11668064	19	1169066	A	G	0.685535	0.0356519	0.00226055	1.2e-58	0.000548021
rs553616728	19	1190729	C	CAA	0.788606	0.0205025	0.00299643	9.3e-12	0.000140151
rs10416087	19	1191288	T	C	0.691996	-0.0142058	0.00229872	7.7e-10	8.60243e-05
rs11880992	19	2176403	G	A	0.591263	0.016953	0.0021265	4.1e-16	0.000138915
rs4806862	19	2523781	G	T	0.671962	-0.0239498	0.00224096	3.1e-27	0.000252873
rs60018147	19	3375572	A	G	0.87959	0.033176	0.00337198	7.4e-23	0.000233142
rs67820526	19	4083916	G	A	0.820657	-0.0195704	0.00275656	8.3e-13	0.000112739
rs11259979	19	8500051	C	T	0.693309	0.0141969	0.00227689	3.4e-10	8.57126e-05
rs556692495	19	12153234	A	G	0.99565	-0.0953464	0.0163459	4.6e-09	7.87471e-05
19:13087170_GGGGT_G	19	13087170	GGGGT	G	0.933924	0.0357192	0.00488815	9.9e-13	0.000157467
rs384478	19	18146385	T	C	0.733133	-0.0178317	0.00239291	3e-14	0.000124421
rs372073489	19	18155753	C	CAA	0.676838	-0.0196074	0.00249346	3e-15	0.00016818
rs10632399	19	18157742	C	CTTTGTTTGTTTG	0.688067	-0.0235223	0.00234725	5.9e-24	0.00023751
rs11670056	19	18589943	C	T	0.9241	0.0258698	0.00394516	3.5e-11	9.38808e-05
rs28626308	19	33517515	C	T	0.955353	-0.126087	0.00505748	7.3e-140	0.00135621
19:33548025_CA_C	19	33548025	CA	C	0.721296	-0.0587161	0.00246542	4.1e-128	0.00138612
rs11881367	19	33551428	G	A	0.906514	-0.112692	0.00359574	3e-226	0.00215247
rs756893948	19	33585219	CT	C	0.734435	-0.0660318	0.00256652	2.7e-151	0.00170083
rs12609177	19	33705455	A	G	0.743018	-0.0156522	0.00239191	8.6e-12	9.35584e-05
19:34778041_CA_C	19	34778041	CA	C	0.383982	0.0139332	0.00230288	2e-09	9.18409e-05
rs28364580	19	41724885	G	A	0.751044	0.0251031	0.00244309	1.8e-26	0.000235653
rs4802111	19	41734059	C	T	0.541065	-0.0161938	0.00210052	1e-15	0.000130235
rs746549124	19	41784353	AAT	A	0.790541	-0.0229806	0.00274941	2.5e-18	0.000174894
rs79371986	19	44338840	C	T	0.794773	-0.0156993	0.00258626	1.7e-09	8.04022e-05
rs8109532	19	45958294	A	G	0.687978	0.0181141	0.00228299	1.8e-15	0.000140872
rs12373539	19	45971095	G	A	0.882674	0.0300454	0.00325909	1.1e-22	0.000186974
rs314675	19	47196079	T	C	0.863784	0.0219674	0.00304642	1e-13	0.000113559
rs10407062	19	57799618	T	C	0.546651	0.0148725	0.00210074	2.7e-13	0.000109633
rs835875	20	4203226	C	T	0.494597	-0.013175	0.00212014	3.8e-10	8.67802e-05
rs805769	20	5667459	T	C	0.594361	-0.0129023	0.002137	6e-12	8.02702e-05
rs2209760	20	6364504	T	C	0.449678	0.0371487	0.00210681	4.7e-71	0.000683024
20:6405923_GT_G	20	6405923	GT	G	0.648061	-0.040633	0.00221161	1.6e-80	0.000753132
rs6054308	20	6472918	A	G	0.388126	-0.0200385	0.00215489	1.4e-19	0.00019072
rs13043599	20	6755009	C	T	0.927809	-0.0417829	0.00404459	9.4e-26	0.000233867
rs2650976	20	6776498	C	T	0.65178	-0.0180117	0.00219913	1.3e-14	0.000147263
rs10668467	20	6856347	T	TGCG	0.379162	0.0166938	0.00216047	1.3e-16	0.000131203
rs6054625	20	6936182	T	C	0.195623	0.0197286	0.00274174	1.1e-13	0.00012249
rs6140183	20	7095113	A	G	0.741543	0.0194402	0.00240128	2.4e-18	0.000144863
rs6117854	20	7551554	G	A	0.673674	0.0415636	0.00224706	4.2e-81	0.000759552
rs34031061	20	7593266	G	C	0.697058	0.0325518	0.00228009	6.3e-50	0.000447516
rs755083964	20	7610002	CTGGTATTG	C	0.77232	0.0161124	0.00250963	3.7e-11	9.13004e-05
20:10485586_GA_G	20	10485586	GA	G	0.972462	0.0790958	0.00652108	2.7e-36	0.000335075
rs117026974	20	10601745	C	T	0.938881	-0.0385805	0.00436499	8e-21	0.000170825
20:10612254_AT_A	20	10612254	AT	A	0.778856	0.0239957	0.00253758	5.9e-23	0.000198349
rs35308216	20	10629525	T	C	0.917941	0.0667042	0.003806	4.9e-75	0.000670313
rs6108653	20	10629872	T	G	0.93175	0.0519128	0.00418597	1.5e-38	0.000342753
rs3790163	20	10647951	A	G	0.207278	0.0380113	0.0026374	1.6e-47	0.000474821
rs6134023	20	10741175	A	T	0.761219	0.0369697	0.00246849	9.2e-55	0.000496857
rs534222792	20	10854989	T	C	0.987463	-0.0953361	0.0115023	2e-17	0.00022504
rs764213	20	10885445	T	C	0.540876	0.0232598	0.00210294	4e-27	0.000268701
rs6040283	20	10984360	T	C	0.53412	-0.0441468	0.00223904	8.3e-89	0.000969932
rs7270518	20	11021643	A	G	0.94993	-0.0376754	0.00480759	2.8e-14	0.000135025
rs6040356	20	11091189	A	G	0.333231	0.0174293	0.00221716	6.3e-16	0.000134993
rs34952318	20	11177055	G	A	0.950515	0.076921	0.00488095	2.9e-59	0.000556612
rs55716188	20	11227112	C	T	0.976523	0.0508498	0.00703338	1.8e-14	0.000118559
rs6108881	20	11239243	T	C	0.270923	0.0168706	0.0023685	5.1e-14	0.000112437
rs7267752	20	17755245	T	C	0.915904	-0.0251917	0.00376663	1.5e-11	9.7762e-05
rs145077631	20	30117956	T	G	0.971603	-0.0436771	0.00667336	3.9e-11	0.000105269
rs548466113	20	32287917	C	T	0.728177	-0.0200328	0.00237402	1.5e-17	0.000158868
rs819135	20	32847767	A	G	0.582206	0.0198145	0.00212029	9.5e-22	0.000191001
rs12625149	20	33425812	G	T	0.628133	-0.0190649	0.00217111	1.2e-20	0.0001698
rs6120804	20	33623701	C	A	0.819054	-0.0274197	0.00272092	4.3e-26	0.000222852
rs2069945	20	33761837	C	G	0.474188	-0.0188444	0.00216312	7.6e-20	0.000177083
rs211839	20	38475318	T	C	0.653091	0.0127999	0.00220079	7.8e-10	7.42391e-05
rs572186767	20	38754705	A	AT	0.720716	0.0164004	0.00235131	3.3e-12	0.00010828
rs6072221	20	39616593	T	C	0.884126	0.036988	0.00366135	1.2e-27	0.000280319
rs17265513	20	39832628	T	C	0.800708	0.0341749	0.00261724	7.6e-45	0.000372742
rs2868346	20	44547970	C	T	0.240776	0.0154253	0.0024414	2.9e-11	8.69922e-05
rs1206751	20	45576907	A	T	0.528754	-0.0181207	0.00210157	3.9e-19	0.000163637
rs78853648	20	45605028	G	GGTTTTGTTTGTGTGTTTATTT	0.256994	-0.0332531	0.00241276	5.8e-44	0.000422289
rs75146649	20	49192312	A	G	0.905263	0.0193437	0.00356982	5.3e-09	6.41806e-05
rs2830913	21	28774023	G	A	0.557818	-0.0263704	0.00212257	1.3e-35	0.00034305
rs12482821	21	35560715	T	G	0.976449	-0.0654682	0.00716079	2.9e-22	0.000197129
rs8134775	21	35591826	T	C	0.800407	-0.0286174	0.00262691	8.7e-30	0.000261666
rs28451064	21	35593827	G	A	0.869025	0.0219937	0.00317606	1.5e-12	0.000110115
rs55787537	21	35717837	T	G	0.824511	0.0277373	0.00277598	1.8e-27	0.000222641
rs73203066	21	36429040	C	G	0.856835	-0.0193783	0.00299599	3.5e-12	9.21288e-05
21:36561230_GA_G	21	36561230	GA	G	0.61736	-0.0151473	0.00237406	3.8e-09	0.0001084
rs7277882	21	36874438	G	A	0.563077	0.0185186	0.00211555	3.8e-19	0.00016874
21:36926852_CT_C	21	36926852	CT	C	0.472749	-0.0198024	0.00211354	8.4e-24	0.000195485
rs448332	21	37919151	C	T	0.0990452	-0.0310523	0.00352434	4e-22	0.000172089
rs2836613	21	40047176	G	A	0.247658	-0.0303614	0.00244175	2.5e-38	0.000343511
rs12165276	21	40330772	G	A	0.940236	-0.040157	0.00443892	2.2e-20	0.00018123
rs9982895	21	40343087	T	C	0.273784	0.0465712	0.00235573	9.4e-91	0.00086246
rs4818988	21	46348764	A	T	0.49204	0.0177586	0.00223035	9.9e-16	0.000157644
rs59500178	21	47853157	A	G	0.455497	0.0125968	0.00210816	8.2e-10	7.87112e-05
rs2904552	22	18905964	C	T	0.89578	-0.0233085	0.00352541	7.6e-12	0.00010144
22:19677948_CG_C	22	19677948	CG	C	0.891774	0.122377	0.00346991	4.8e-290	0.00289079
rs9606139	22	19679303	G	A	0.892005	0.122246	0.00343946	1.3e-295	0.00287919
rs5748404	22	19683382	C	G	0.74012	-0.0340798	0.0024298	9.2e-45	0.000446785
rs2298428	22	21982892	C	T	0.818131	0.0178885	0.00271495	5.9e-12	9.52268e-05
rs5844547	22	23460684	C	CT	0.715184	0.0133019	0.00232826	5.4e-09	7.20841e-05
rs1883282	22	25411420	T	C	0.820991	0.0148027	0.00274878	5.5e-09	6.44058e-05
rs6005857	22	29146002	C	T	0.955193	0.0284315	0.00507761	3.8e-09	6.91937e-05
rs71316863	22	29181165	C	CTTGTTTTGTT	0.946343	0.0437333	0.00465048	7.2e-22	0.000194236
rs5762862	22	29252732	G	A	0.788492	0.0234807	0.00256723	1.9e-22	0.000183898
rs73388841	22	29255570	T	C	0.943428	0.0486055	0.0045406	9.6e-28	0.00025218
rs757625199	22	29274235	CT	C	0.831092	0.0265847	0.0028922	1.1e-20	0.000198423
rs5762879	22	29286180	C	T	0.827345	0.0151569	0.00277527	1.2e-09	6.56321e-05
rs540182926	22	29323916	G	A	0.996366	0.162069	0.0184895	1.8e-19	0.00019021
rs11704898	22	29447111	C	T	0.590088	-0.0171117	0.00215885	1.3e-14	0.000141652
rs377326799	22	29474482	A	AAAG	0.3547	0.0474973	0.0022047	7.6e-111	0.00103274
rs75337432	22	29733510	C	T	0.92125	0.0395155	0.00388654	1.3e-26	0.000226565
rs41281637	22	30639993	C	T	0.992238	0.0915373	0.0119357	6.3e-15	0.000129067
rs6006426	22	30669883	G	A	0.459215	0.0136966	0.00210222	5.5e-13	9.31743e-05
rs8142064	22	33174981	C	T	0.856272	0.0210513	0.00299092	2e-12	0.000109079
rs7078	22	36677914	A	G	0.693649	-0.0232588	0.00230565	2.1e-24	0.000229913
rs28430325	22	36829002	C	T	0.948661	-0.0359644	0.00478698	2.3e-15	0.000125989
rs4254591	22	38304858	G	T	0.657704	-0.0176222	0.00220588	4.7e-15	0.000139824
rs386821292	22	38942299	G	GC	0.50302	0.0155901	0.0021142	5.8e-15	0.000121521
rs5757133	22	38947835	C	T	0.713781	0.0254855	0.00231894	1.6e-32	0.000265387
rs5750643	22	39009017	A	G	0.691731	0.0243583	0.00226903	2.5e-31	0.000253041
rs7290979	22	39044427	A	C	0.711436	0.0261582	0.00231848	3.1e-34	0.000280947
rs139497	22	41640098	C	T	0.311837	-0.0194639	0.00227226	2.1e-21	0.000162596
rs1569414	22	45727565	T	G	0.739924	0.017623	0.00238084	7.7e-14	0.00011953
rs77114534	22	46101806	C	T	0.958222	-0.0412245	0.00527127	2.4e-15	0.000136068
rs9626436	22	46151121	C	T	0.871281	-0.0191863	0.00313182	8.4e-11	8.25683e-05
rs570639864	22	46365137	G	A	0.997251	0.143702	0.0206874	4.1e-13	0.000113223
rs62654723	22	46375611	C	T	0.832898	-0.0302168	0.00283724	4.1e-28	0.000254156
rs145069606	22	50235192	A	G	0.878672	0.0255872	0.00321915	3.5e-16	0.000139593
rs5770908	22	50877718	G	A	0.674593	0.0186065	0.00223703	4.3e-18	0.000151995
rs12832436	23	43842090	G	A	0.68021	0.027613	0.00186717	3.9e-54	0.000331715
									0.447449
